# Supplementary material for: Genome-wide identification, phylogenetic and expression pattern analysis of Dof transcription factors in blueberry (Vaccinium corymbosum L.)
Source: PeerJ. 2022 Oct 3;10:e14087. doi: 10.7717/peerj.14087 (PMC9536302; doi:10.7717/peerj.14087)
Supplement: Supplemental Information 1 [file peerj-10-14087-s001.xlsx]

## Sheet: Table S1
Supplementary Table 1. Primer sequences used in the experiment
Primer	Sequences
VcEIF-RT-F	GGAGGAAAGGTGTTGCCATCA
VcEIF-RT-R	GGAGATCAGCAACGTTTGCTG
VcDof1-RT-F	GCCCTGGTGTATTTCCTA
VcDof1-RT-R	CTCGATCAATGGCTCTTC
VcDof2-RT-F	CAGAGGATGTAATGGTGAGGTGGGT
VcDof2-RT-R	GTACAGCGAATGATCGTTGTCAGG
VcDof5-RT-F	TGGAGGTATTAGCAATGGAAACA
VcDof5-RT-R	TTCACATCTAGGGCACTTTAGGC
VcDof11-RT-F	ACCAACCCGAGCCAGAAG
VcDof11-RT-R	GAGGGCGTTTCTTGTTGC
VcDof14-RT-F	CAAGAAATGGGTTTATTCAAGAGC
VcDof14-RT-R	AGGAGGGTAGAAAGGCATAGGGA
VcDof15-RT-F	ATCCGAGTCGAGAAGAAGATCAAA
VcDof15-RT-R	CTCGAAATTTGGAAAAGTG
VcDof47-RT-F	GCACTCGCAACCACAGCAGCAAA
VcDof47-RT-R	CGTTCAGGTTCACGCCGAACGAA
VcDof49-RT-F	ACCAAAGCCACCACAAGA
VcDof49-RT-R	CCTCCACCTACAGGAACAT
