# Supplementary material for: Genome-wide identification, phylogenetic and expression pattern analysis of Dof transcription factors in blueberry (Vaccinium corymbosum L.)
Source: PeerJ. 2022 Oct 3;10:e14087. doi: 10.7717/peerj.14087 (PMC9536302; doi:10.7717/peerj.14087)
Supplement: Supplemental Information 2 [file peerj-10-14087-s002.xlsx]

## Sheet: Table S2
	Supplementary Table 2. Raw data for qRT-PCR
	VcDof1	Treatments	Ct(Gene)	Ct(EIF)	△Ct	△Ct reference value	△△Ct	Relative expression	Average expression		VcDof2	Treatments	Ct(Gene)	Ct(EIF)	△Ct	△Ct reference value	△△Ct	Relative expression	Average expression
		Salt-0h	27.02	26.66	0.36	0.36	0	1	1			Salt-0h	23.75	26.66	-2.91	-2.91	0	1	1
			26.27	26.22	0.05	0.05	0	1					23.73	26.22	-2.49	-2.49	0	1
			26.95	26.35	0.6	0.6	0	1					23.4	26.35	-2.95	-2.95	0	1
		Salt-3h	29.18	29.8	-0.62	0.36	-0.98	1.97247	1.49522			Salt-3h	29.76	29.8	-0.04	-2.91	2.87	0.136787	0.124481
			29.42	29.48	-0.06	0.05	-0.11	1.07923					30.12	29.48	0.64	-2.49	3.13	0.114229
			28.98	28.9	0.08	0.6	-0.52	1.43396					28.98	28.9	0.08	-2.95	3.03	0.122428
		Salt-6h	30.55	27.58	2.97	0.36	2.61	0.163799	0.200611			Salt-6h	24.31	27.58	-3.27	-2.91	-0.36	1.28343	1.27358
			30.27	27.68	2.59	0.05	2.54	0.171943					25.01	27.68	-2.67	-2.49	-0.18	1.13288
			30.51	28	2.51	0.6	1.91	0.266093					24.56	28	-3.44	-2.95	-0.49	1.40444
		Salt-12h	30.53	28.99	1.54	0.36	1.18	0.441351	0.356685			Salt-12h	26.48	28.99	-2.51	-2.91	0.4	0.757858	0.689176
			30.05	28.83	1.22	0.05	1.17	0.444421					26.71	28.83	-2.12	-2.49	0.37	0.773782
			30.51	27.47	3.04	0.6	2.44	0.184284					25.42	27.47	-2.05	-2.95	0.9	0.535887
		Salt-24h	26.61	29.29	-2.68	0.36	-3.04	8.22491	7.21866			Salt-24h	27.39	29.29	-1.9	-2.91	1.01	0.496546	0.370239
			26.98	29.59	-2.61	0.05	-2.66	6.32033					28.04	28.59	-0.55	-2.49	1.94	0.260616
			27.25	29.48	-2.23	0.6	-2.83	7.11074					28.03	29.48	-1.45	-2.95	1.5	0.353553
		Drought-0h	25.84	25.31	0.53	0.53	0	1	1			Drought-0h	24.32	25.31	-0.99	-0.99	0	1	1
			26.71	25.68	1.03	1.03	0	1					24	25.68	-1.68	-1.68	0	1
			26.88	25.45	1.43	1.43	0	1					23.52	25.45	-1.93	-1.93	0	1
		Drought-3h	28.66	25.28	3.38	0.53	2.85	0.138696	0.112017			Drought-3h	24.47	25.28	-0.81	-0.99	0.18	0.882703	0.664267
			29.55	25.33	4.22	1.03	3.19	0.109576					24.18	25.33	-1.15	-1.68	0.53	0.692555
			30.15	25.21	4.94	1.43	3.51	0.0877778					24.54	25.21	-0.67	-1.93	1.26	0.417544
		Drought-6h	31.05	28.93	2.12	0.53	1.59	0.332171	0.312734			Drought-6h	27.41	28.93	-1.52	-0.99	-0.53	1.44393	1.09797
			31.67	28.09	3.58	1.03	2.55	0.170755					26.44	28.09	-1.65	-1.68	0.03	0.97942
			30.91	28.28	2.63	1.43	1.2	0.435275					26.55	28.28	-1.73	-1.93	0.2	0.870551
		Drought-12h	31.49	27.48	4.01	0.53	3.48	0.0896222	0.155231			Drought-12h	25.78	27.48	-1.7	-0.99	-0.71	1.6358	1.4308
			31.58	27.62	3.96	1.03	2.93	0.131215					25.42	27.62	-2.2	-1.68	-0.52	1.43396
			30.7	27.24	3.46	1.43	2.03	0.244855					25.02	27.24	-2.22	-1.93	-0.29	1.22264
		Drought-24h	30.85	31.05	-0.2	0.53	-0.73	1.65864	1.69483			Drought-24h	30.21	31.05	-0.84	-0.99	0.15	0.90125	0.792615
			31.62	31.43	0.19	1.03	-0.84	1.79005					30.34	31.43	-1.09	-1.68	0.59	0.664343
			31.92	31.2	0.72	1.43	-0.71	1.6358					30.07	31.7	-1.63	-1.93	0.3	0.812252
		ABA-0h	27.02	26.66	0.36	0.36	0	1	1			ABA-0h	26.46	26.66	-0.2	-0.2	0	1	1
			26.27	26.22	0.05	0.05	0	1					27.12	26.22	0.9	0.9	0	1
			26.95	26.35	0.6	0.6	0	1					26.66	26.35	0.31	0.31	0	1
		ABA-3h	29.18	29.8	-0.62	0.36	-0.98	1.97247	1.49522			ABA-3h	26.04	29.8	-3.76	-0.2	-3.56	11.7942	10.8029
			29.42	29.48	-0.06	0.05	-0.11	1.07923					26.85	29.48	-2.63	0.9	-3.53	11.5514
			28.98	28.9	0.08	0.6	-0.52	1.43396					26.03	28.9	-2.87	0.31	-3.18	9.06307
		ABA-6h	30.55	27.58	2.97	0.36	2.61	0.163799	0.200611			ABA-6h	26.07	27.58	-1.51	-0.2	-1.31	2.47942	3.95411
			30.27	27.68	2.59	0.05	2.54	0.171943					26.34	27.68	-1.34	0.9	-2.24	4.72397
			30.51	28	2.51	0.6	1.91	0.266093					26.09	28	-1.91	0.31	-2.22	4.65893
		ABA-12h	30.53	28.99	1.54	0.36	1.18	0.441351	0.418113			ABA-12h	25.63	28.99	-3.36	-0.2	-3.16	8.9383	10.5349
			30.05	28.83	1.22	0.05	1.17	0.444421					26.02	28.83	-2.81	0.9	-3.71	13.0864
			30.51	28.47	2.04	0.6	1.44	0.368567					25.52	28.47	-2.95	0.31	-3.26	9.57983
		ABA-24h	26.61	29.29	-2.68	0.36	-3.04	8.22491	8.43966			ABA-24h	24.76	29.29	-4.53	-0.2	-4.33	20.1122	22.3776
			26.58	29.59	-3.01	0.05	-3.06	8.33973					25.96	29.59	-3.63	0.9	-4.53	23.1029
			26.95	29.48	-2.53	0.6	-3.13	8.75435					25.21	29.48	-4.27	0.31	-4.58	23.9176
	VcDof5	Treatments	Ct(Gene)	Ct(EIF)	△Ct	△Ct reference value	△△Ct	Relative expression	Average expression		VcDof11	Treatments	Ct(Gene)	Ct(EIF)	△Ct	△Ct reference value	△△Ct	Relative expression	Average expression
		Salt-0h	26.45	26.66	-0.21	-0.21	0	1	1			Salt-0h	27.09	26.66	0.43	0.43	0	1	1
			26.95	26.22	0.73	0.73	0	1					26.72	26.22	0.5	0.5	0	1
			26.61	26.35	0.26	0.26	0	1					27.12	26.35	0.77	0.77	0	1
		Salt-3h	30.18	29.8	0.38	-0.21	0.59	0.664343	0.607557			Salt-3h	28.54	29.8	-1.26	0.43	-1.69	3.22657	2.46141
			30.69	29.48	1.21	0.73	0.48	0.716978					28.59	29.48	-0.89	0.5	-1.39	2.62079
			30.34	28.9	1.44	0.26	1.18	0.441351					29.05	28.9	0.15	0.77	-0.62	1.53688
		Salt-6h	28.23	27.58	0.65	-0.21	0.86	0.550953	0.57917			Salt-6h	28.83	27.58	1.25	0.43	0.82	0.566442	0.82496
			29.03	27.68	1.35	0.73	0.62	0.650671					28.9	27.68	1.22	0.5	0.72	0.607097
			29.16	28	1.16	0.26	0.9	0.535887					28.39	28	0.39	0.77	-0.38	1.30134
		Salt-12h	28.93	28.99	-0.06	-0.21	0.15	0.90125	0.826693			Salt-12h	29.01	28.99	0.02	0.43	-0.41	1.32869	1.66235
			29.75	28.83	0.92	0.73	0.19	0.876606					28.29	28.83	-0.54	0.5	-1.04	2.05623
			28.24	27.47	0.77	0.26	0.51	0.702222					27.56	27.47	0.09	0.77	-0.68	1.60214
		Salt-24h	29.02	29.29	-0.27	-0.21	-0.06	1.04247	1.1145			Salt-24h	27.65	29.29	-1.64	0.43	-2.07	4.19887	4.12553
			28.98	28.59	0.39	0.73	-0.34	1.26576					27.13	28.59	-1.46	0.5	-1.96	3.89062
			29.69	29.48	0.21	0.26	-0.05	1.03526					28.15	29.48	-1.33	0.77	-2.1	4.28709
		Drought-0h	26.78	25.31	1.47	1.47	0	1	1			Drought-0h	27.12	25.31	1.81	1.81	2.22045e-15	1	1
			27.67	25.68	1.99	1.99	0	1					27.17	25.68	1.49	1.49	1.9984e-15	1
			26.7	25.45	1.25	1.25	0	1					26.96	25.45	1.51	1.51	0	1
		Drought-3h	27.93	25.28	2.65	1.47	1.18	0.441351	0.436303			Drought-3h	28	25.28	2.72	1.81	0.91	0.532185	0.753878
			28.12	25.33	2.79	1.99	0.8	0.574349					27.06	25.33	1.73	1.49	0.24	0.846745
			28.23	25.21	3.02	1.25	1.77	0.293209					26.9	25.21	1.69	1.51	0.18	0.882703
		Drought-6h	29.06	28.93	0.13	1.47	-1.34	2.53151	3.45719			Drought-6h	28.91	28.93	-0.02	1.81	-1.83	3.55537	3.152
			28.16	28.09	0.07	1.99	-1.92	3.78423					28.07	28.09	-0.02	1.49	-1.51	2.8481
			27.51	28.28	-0.77	1.25	-2.02	4.05584					28.18	28.28	-0.1	1.51	-1.61	3.05252
		Drought-12h	29.13	27.48	1.65	1.47	0.18	0.882703	1.46594			Drought-12h	27.66	27.48	0.18	1.81	-1.63	3.09513	2.17017
			28.33	27.62	0.71	1.99	-1.28	2.42839					28.73	27.62	1.11	1.49	-0.38	1.30134
			28.37	27.24	1.13	1.25	-0.12	1.08673					27.67	27.24	0.43	1.51	-1.08	2.11404
		Drought-24h	29.99	31.05	-1.06	1.47	-2.53	5.77572	6.80088			Drought-24h	28.33	31.05	-2.72	1.81	-4.53	23.1029	22.5797
			30.51	31.43	-0.92	1.99	-2.91	7.51618					28.42	31.43	-3.01	1.49	-4.5	22.6274
			30.12	31.7	-1.58	1.25	-2.83	7.11074					28.75	31.7	-2.95	1.51	-4.46	22.0087
		ABA-0h	30.04	26.66	3.38	3.38	0	1	1			ABA-0h	29.26	26.66	2.6	2.6	0	1	1
			29.3	26.22	3.08	3.08	0	1					28.62	26.22	2.4	2.4	0	1
			29.67	26.35	3.32	3.32	0	1					28.22	26.35	1.87	1.87	-2.66454e-15	1
		ABA-3h	28.73	29.8	-1.07	3.38	-4.45	21.8566	19.5827			ABA-3h	29.76	29.8	-0.04	2.6	-2.64	6.23332	5.68341
			28.33	29.48	-1.15	3.08	-4.23	18.7654					29.47	29.48	-0.01	2.4	-2.41	5.31474
			28.04	28.9	-0.86	3.32	-4.18	18.1261					28.31	28.9	-0.59	1.87	-2.46	5.50217
		ABA-6h	29.51	27.58	1.93	3.38	-1.45	2.73208	2.23371			ABA-6h	29.17	27.58	1.59	2.6	-1.01	2.01391	2.3766
			30.76	27.68	3.08	3.08	0	1					28.85	27.68	1.17	2.4	-1.23	2.34567
			29.75	28	1.75	3.32	-1.57	2.96905					28.4	28	0.4	1.87	-1.47	2.77022
		ABA-12h	29.57	28.99	0.58	3.38	-2.8	6.9644	6.23467			ABA-12h	28.49	28.99	-0.5	2.6	-3.1	8.57419	8.0651
			29.52	28.83	0.69	3.08	-2.39	5.24157					28.23	28.83	-0.6	2.4	-3	8
			29.09	28.47	0.62	3.32	-2.7	6.49802					27.41	28.47	-1.06	1.87	-2.93	7.6211
		ABA-24h	29.64	29.29	0.35	3.38	-3.03	8.1681	6.64578			ABA-24h	29.3	29.29	0.01	2.6	-2.59	6.02099	6.54652
			30.19	29.59	0.6	3.08	-2.48	5.57897					29.14	29.59	-0.45	2.4	-2.85	7.21
			30.17	29.48	0.69	3.32	-2.63	6.19026					28.67	29.48	-0.81	1.87	-2.68	6.40856
	VcDof14	Treatments	Ct(Gene)	Ct(EIF)	△Ct	△Ct reference value	△△Ct	Relative expression	Average expression		VcDof15	Treatments	Ct(Gene)	Ct(EIF)	△Ct	△Ct reference value	△△Ct	Relative expression	Average expression
		Salt-0h	23.05	26.66	-3.61	-3.61	0	1	1			Salt-0h	27.81	26.66	1.15	1.15	0	1	1
			22.6	26.22	-3.62	-3.62	0	1					28.05	26.22	1.83	1.83	1.77636e-15	1
			23.3	26.35	-3.05	-3.05	0	1					27.92	26.35	1.57	1.57	0	1
		Salt-3h	26.89	29.8	-2.91	-3.61	0.7	0.615572	0.584353			Salt-3h	29.51	29.8	-0.29	1.15	-1.44	2.71321	2.34742
			26.81	29.48	-2.67	-3.62	0.95	0.517632					30.45	29.48	0.97	1.83	-0.86	1.81504
			26.54	28.9	-2.36	-3.05	0.69	0.619854					29.14	28.9	0.24	1.57	-1.33	2.51403
		Salt-6h	24.31	27.58	-3.27	-3.61	0.34	0.790041	0.958121			Salt-6h	27.77	27.58	0.19	1.15	-0.96	1.94531	4.01455
			24.12	27.68	-3.56	-3.62	0.06	0.959264					27.12	27.68	-0.56	1.83	-2.39	5.24157
			24.78	28	-3.22	-3.05	-0.17	1.12506					27.29	28	-0.71	1.57	-2.28	4.85678
		Salt-12h	29.36	28.99	0.37	-3.61	3.98	0.0633725	0.073194			Salt-12h	28.87	28.99	-0.12	1.15	-1.27	2.41162	2.0341
			28.32	28.83	-0.51	-3.62	3.11	0.115824					29.42	28.83	0.59	1.83	-1.24	2.36199
			29.05	27.47	1.58	-3.05	4.63	0.040386					28.63	27.47	1.16	1.57	-0.41	1.32869
		Salt-24h	25.89	29.29	-3.4	-3.61	0.21	0.864537	0.843749			Salt-24h	27.04	29.29	-2.25	1.15	-3.4	10.5561	10.9001
			25.57	28.59	-3.02	-3.62	0.6	0.659754					27.12	28.59	-1.47	1.83	-3.3	9.84916
			26.42	29.48	-3.06	-3.05	-0.01	1.00696					27.43	29.48	-2.05	1.57	-3.62	12.295
		Drought-0h	22.62	25.31	-2.69	-2.69	0	1	1			Drought-0h	25.19	25.31	-0.12	-0.12	-4.44089e-16	1	1
			22.59	25.68	-3.09	-3.09	0	1					25.57	25.68	-0.11	-0.11	-4.30211e-16	1
			23.15	25.45	-2.3	-2.3	0	1					25.84	25.45	0.39	0.39	-4.44089e-16	1
		Drought-3h	23.69	25.28	-1.59	-2.69	1.1	0.466516	0.52314			Drought-3h	23.54	25.28	-1.74	-0.12	-1.62	3.07375	3.38059
			23.24	25.33	-2.09	-3.09	1	0.5					23.27	25.33	-2.06	-0.11	-1.95	3.86375
			23.64	25.21	-1.57	-2.3	0.73	0.602904					23.92	25.21	-1.29	0.39	-1.68	3.20428
		Drought-6h	25.1	28.93	-3.83	-2.69	-1.14	2.20381	2.22314			Drought-6h	27	28.93	-1.93	-0.12	-1.81	3.50642	3.29437
			24.01	28.09	-4.08	-3.09	-0.99	1.98618					26.4	28.09	-1.69	-0.11	-1.58	2.9897
			24.67	28.28	-3.61	-2.3	-1.31	2.47942					26.91	28.28	-1.37	0.39	-1.76	3.38698
		Drought-12h	26.53	27.48	-0.95	-2.69	1.74	0.29937	0.239055			Drought-12h	29.66	27.48	2.18	-0.12	2.3	0.203063	0.343252
			26.84	27.62	-0.78	-3.09	2.31	0.20166					28.75	27.62	1.13	-0.11	1.24	0.423373
			27.15	27.24	-0.09	-2.3	2.21	0.216134					28.94	27.24	1.7	0.39	1.31	0.403321
		Drought-24h	27.37	31.05	-3.68	-2.69	-0.99	1.98618	2.08126			Drought-24h	27.59	31.05	-3.46	-0.12	-3.34	10.1261	10.5446
			27.26	31.43	-4.17	-3.09	-1.08	2.11404					28.04	31.43	-3.39	-0.11	-3.28	9.71356
			28.3	31.7	-3.4	-2.3	-1.1	2.14355					28.53	31.7	-3.17	0.39	-3.56	11.7942
		ABA-0h	26.37	26.66	-0.29	-0.29	0	1	1			ABA-0h	27.79	26.66	1.13	1.13	0	1	1
			26.69	26.22	0.47	0.47	0	1					26.48	26.22	0.26	0.26	0	1
			26.11	26.35	-0.24	-0.24	0	1					27.4	26.35	1.05	1.05	0	1
		ABA-3h	27.16	29.8	-2.64	-0.29	-2.35	5.09824	5.0463			ABA-3h	27.99	29.8	-1.81	1.13	-2.94	7.67411	6.90825
			27.48	29.48	-2	0.47	-2.47	5.54044					27.09	29.48	-2.39	0.26	-2.65	6.27667
			26.49	28.9	-2.41	-0.24	-2.17	4.50023					27.19	28.9	-1.71	1.05	-2.76	6.77396
		ABA-6h	27.47	27.58	-0.11	-0.29	0.18	0.882703	0.994651			ABA-6h	27.32	27.58	-0.26	1.13	-1.39	2.62079	2.26106
			28.02	27.68	0.34	0.47	-0.13	1.09429					27.25	27.68	-0.43	0.26	-0.69	1.61328
			27.75	28	-0.25	-0.24	-0.01	1.00696					27.7	28	-0.3	1.05	-1.35	2.54912
		ABA-12h	28.6	28.99	-0.39	-0.29	-0.1	1.07177	1.34057			ABA-12h	29.4	28.99	0.41	1.13	-0.72	1.64718	1.66832
			28.42	28.83	-0.41	0.47	-0.88	1.84038					28.43	28.83	-0.4	0.26	-0.66	1.58008
			28.08	28.47	-0.39	-0.24	-0.15	1.10957					28.69	28.47	0.22	1.05	-0.83	1.77769
		ABA-24h	29.37	29.29	0.08	-0.29	0.37	0.773782	0.853885			ABA-24h	28.51	29.29	-0.78	1.13	-1.91	3.75809	3.46682
			29.91	29.59	0.32	0.47	-0.15	1.10957					28.19	29.59	-1.4	0.26	-1.66	3.16017
			29.8	29.48	0.32	-0.24	0.56	0.678302					28.73	29.48	-0.75	1.05	-1.8	3.4822
	VcDof47	Treatments	Ct(Gene)	Ct(EIF)	△Ct	△Ct reference value	△△Ct	Relative expression	Average expression		VcDof49	Treatments	Ct(Gene)	Ct(EIF)	△Ct	△Ct reference value	△△Ct	Relative expression	Average expression
		Salt-0h	28.38	26.66	1.72	1.72	0	1	1			Salt-0h	26.07	26.66	-0.59	-0.59	0	1	1
			28.47	26.22	2.25	2.25	0	1					25.18	26.22	-1.04	-1.04	0	1
			29.2	26.35	2.85	2.85	0	1					26.05	26.35	-0.3	-0.3	0	1
		Salt-3h	35.37	29.8	5.57	1.72	3.85	0.0693481	0.0841704			Salt-3h	31.35	29.8	1.55	-0.59	2.14	0.22688	0.262161
			35.01	29.48	5.53	2.25	3.28	0.102949					30.07	29.48	0.59	-1.04	1.63	0.323088
			35.39	28.9	6.49	2.85	3.64	0.0802141					30.68	28.9	1.78	-0.3	2.08	0.236514
		Salt-6h	29.9	27.58	2.32	1.72	0.6	0.659754	0.897207			Salt-6h	26.57	27.58	-1.01	-0.59	-0.42	1.33793	1.39977
			30	27.68	2.32	2.25	0.07	0.952638					26.36	27.68	-1.32	-1.04	-0.28	1.21419
			30.74	28	2.74	2.85	-0.11	1.07923					26.98	28	-1.02	-0.3	-0.72	1.64718
		Salt-12h	31.92	28.99	2.93	1.72	1.21	0.432269	0.550248			Salt-12h	28.35	28.99	-0.64	-0.59	-0.05	1.03526	0.760944
			31.78	28.83	2.95	2.25	0.7	0.615572					28.19	28.83	-0.64	-1.04	0.4	0.757858
			31.05	27.47	3.58	2.85	0.73	0.602904					28.2	27.47	0.73	-0.3	1.03	0.48971
		Salt-24h	31.17	29.29	1.88	1.72	0.16	0.895025	1.01835			Salt-24h	28.88	29.29	-0.41	-0.59	0.18	0.882703	0.867562
			31.03	28.59	2.44	2.25	0.19	0.876606					28.42	28.59	-0.17	-1.04	0.87	0.547147
			31.97	29.48	2.49	2.85	-0.36	1.28343					28.95	29.48	-0.53	-0.3	-0.23	1.17283
		Drought-0h	29.01	25.31	3.7	3.7	0	1	1			Drought-0h	25.17	25.31	-0.14	-0.14	0	1	1
			29.95	25.68	4.27	4.27	0	1					26.26	25.68	0.58	0.58	0	1
			29.89	25.45	4.44	4.44	0	1					25.85	25.45	0.4	0.4	0	1
		Drought-3h	30.76	25.28	5.48	3.7	1.78	0.291183	0.395915			Drought-3h	27.14	25.28	1.86	-0.14	2	0.25	0.334594
			31	25.33	5.67	4.27	1.4	0.378929					27.4	25.33	2.07	0.58	1.49	0.356013
			30.6	25.21	5.39	4.44	0.95	0.517632					26.94	25.21	1.73	0.4	1.33	0.397768
		Drought-6h	32.34	28.93	3.41	3.7	-0.29	1.22264	1.37288			Drought-6h	28.42	28.93	-0.51	-0.14	-0.37	1.29235	1.06238
			32.08	28.09	3.99	4.27	-0.28	1.21419					29.14	28.09	1.05	0.58	0.47	0.721965
			31.97	28.28	3.69	4.44	-0.75	1.68179					28.45	28.28	0.17	0.4	-0.23	1.17283
		Drought-12h	30.2	27.48	2.72	3.7	-0.98	1.97247	2.16843			Drought-12h	26.1	27.48	-1.38	-0.14	-1.24	2.36199	2.55288
			30.84	27.62	3.22	4.27	-1.05	2.07053					26.78	27.62	-0.84	0.58	-1.42	2.67586
			30.38	27.24	3.14	4.44	-1.3	2.46229					26.25	27.24	-0.99	0.4	-1.39	2.62079
		Drought-24h	33.7	31.05	2.65	3.7	-1.05	2.07053	2.02389			Drought-24h	31.45	31.05	0.4	-0.14	0.54	0.687771	0.643914
			34.58	31.43	3.15	4.27	-1.12	2.17347					33.02	31.43	1.59	0.58	1.01	0.496546
			35.27	31.7	3.57	4.44	-0.87	1.82766					32.52	31.7	0.82	0.4	0.42	0.747425
		ABA-0h	31.22	26.66	4.56	4.56	0	1	1			ABA-0h	29.48	26.66	2.82	2.82	0	1	1
			31.37	26.22	5.15	5.15	0	1					29.62	26.22	3.4	3.4	0	1
			32.16	26.35	5.81	5.81	0	1					30	26.35	3.65	3.65	0	1
		ABA-3h	31.34	29.8	1.54	4.56	-3.02	8.11168	8.9419			ABA-3h	27.37	29.8	-2.43	2.82	-5.25	38.0546	39.3319
			31.46	29.48	1.98	5.15	-3.17	9.00047					27.51	29.48	-1.97	3.4	-5.37	41.3553
			31.43	28.9	2.53	5.81	-3.28	9.71356					27.28	28.9	-1.62	3.65	-5.27	38.5859
		ABA-6h	30.39	27.58	2.81	4.56	-1.75	3.36359	3.80957			ABA-6h	27.17	27.58	-0.41	2.82	-3.23	9.38268	11.064
			30.89	27.68	3.21	5.15	-1.94	3.83706					27.61	27.68	-0.07	3.4	-3.47	11.0809
			31.73	28	3.73	5.81	-2.08	4.22807					27.98	28	-0.02	3.65	-3.67	12.7286
		ABA-12h	30.16	28.99	1.17	4.56	-3.39	10.4831	11.3356			ABA-12h	27.19	28.99	-1.8	2.82	-4.62	24.59	27.039
			30.48	28.83	1.65	5.15	-3.5	11.3137					27.36	28.83	-1.47	3.4	-4.87	29.2426
			30.67	28.47	2.2	5.81	-3.61	12.2101					27.35	28.47	-1.12	3.65	-4.77	27.2843
		ABA-24h	31.06	29.29	1.77	4.56	-2.79	6.9163	8.02105			ABA-24h	27.02	29.29	-2.27	2.82	-5.09	34.0598	36.4861
			31.9	29.59	2.31	5.15	-2.84	7.1602					27.69	29.59	-1.9	3.4	-5.3	39.3966
			31.97	29.48	2.49	5.81	-3.32	9.98664					27.96	29.48	-1.52	3.65	-5.17	36.0019
