# Supplementary material for: Genome-wide identification, phylogenetic and expression pattern analysis of Dof transcription factors in blueberry (Vaccinium corymbosum L.)
Source: PeerJ. 2022 Oct 3;10:e14087. doi: 10.7717/peerj.14087 (PMC9536302; doi:10.7717/peerj.14087)
Supplement: Supplemental Information 3 [file peerj-10-14087-s003.xlsx]

## Sheet: Sheet1
Supplementary Table 3. The sequence used in the present research.
>AtDof1.1
MAFPSNWSQPTNSNHQHHLQHQLNENGSIISGHGLVLSHQLPPLQANPNPNHHHVATSAGLPSRMGGSMAERARQANIPPLAGPLKCPRCDSSNTKFCYYNNYNLTQPRHFCKGCRRYWTQGGALRNVPVGGGCRRNNKKGKNGNLKSSSSSSKQSSSVNAQSPSSGQLRTNHQFPFSPTLYNLTQLGGIGLNLAATNGNNQAHQIGSSLMMSDLGFLHGRNTSTPMTGNIHENNNNNNNENNLMASVGSLSPFALFDPTTGLYAFQNDGNIGNNVGISGSSTSMVDSRVYQTPPVKMEEQPNLANLSRPVSGLTSPGNQTNQYFWPGSDFSGPSNDLL
>AtDof1.2
MLPYIGHNSYQQHQFPLPEMEIPEKWKLSYEQEAITAPACPRCASSNTKFCYYNNYSLSQPRYFCKGCRRYWTKGGSLRNIPVGGGCRKRSRSRQNSHKRFGRNENRPDGLINQDDGFQSSPPGSDIDLAAVFAQYVTDRSPSSTDNTTGSDQDSPITTTTHALESLSWDICQETDVDLGFYGEFNNLTQKTKEDQEVFGQFLQEDREEIFEFQGLLDDKEIQEILECSFSEEPDQLVSQGSFMINGDNWSSTDLTRFGI
>AtDof1.3
MSSKIGMSQVRDTPVKLFGWTITPVSHDPYSSSSHVLPDSSSSSSSSSLSLRPHMMNNQSVTDNTSLKLSSNLNNESKETSENSDDQHSEITTITSEEEKTTELKKPDKILPCPRCNSADTKFCYYNNYNVNQPRHFCRKCQRYWTAGGSMRIVPVGSGRRKNKGWVSSDQYLHITSEDTDNYNSSSTKILSFESSDSLVTERPKHQSNEVKINAEPVSQEPNNFQGLLPPQASPVSPPWPYQYPPNPSFYHMPVYWGCAIPVWSTLDTSTCLGKRTRDETSHETVKESKNAFERTSLLLESQSIKNETSMATNNHVWYPVPMTREKTQEFSFFSNGAETKSSNNRFVPETYLNLQANPAAMARSMNFRESI
>AtDof1.4
MFGNCDQNKKMPIISSPNTNPLASMQSKNMIVASSHQQQQQQQPQQPQPQLKCPRCDSSNTKFCYYNNYSLSQPRHFCKACKRYWTRGGTLRNVPVGGSYRKNKRVKRPSTATTTTASTVSTTNSSSPNNPHQISHFSSMNHHPLFYGLSDHMSSCNNNLPMIPSRFSDSSKTCSSSGLESEFLSSGFSSLSALGLGLPHQMSHDHTINGSFINNSTTNKPFLLSGLFGSSMSSSSTLLQHPHKPMNNGGDMLGQSHLQTLASLQDLHVGGNNEDMKYKEGKLDQISGNINGFMSSSSSLDPSNYNNMWNNASVVNGAWLDPTNNNVGSSLTSLI
>AtDof1.5
MATQDSQGIKLFGKTITFNANITQTIKKEEQQQQQQPELQATTAVRSPSSDLTAEKRPDKIIPCPRCKSMETKFCYFNNYNVNQPRHFCKGCQRYWTAGGALRNVPVGAGRRKSKPPGRVGGFAELLGAATGAVDQVELDALLVEEWRAATASHGGFRHDFPVKRLRCYTDGQSC
>AtDof1.6
MPSEPNQTRPTRVQPSTAAYPPPNLAEPLPCPRCNSTTTKFCYYNNYNLAQPRYYCKSCRRYWTQGGTLRDVPVGGGTRRSSSKRHRSFSTTATSSSSSSSVITTTTQEPATTEASQTKVTNLISGHGSFASLLGLGSGNGGLDYGFGYGYGLEEMSIGYLGDSSVGEIPVVDGCGGDTWQIGEIEGKSGGDSLIWPGLEISMQTNDVK
>AtDof1.7
MQDLTSAAAYYHQSMMMTTAKQNQPELPEQEQLKCPRCDSPNTKFCYYNNYNLSQPRHFCKNCRRYWTKGGALRNIPVGGGTRKSNKRSGSSPSSNLKNQTVAEKPDHHGSGSEEKEERVSGQEMNPTRMLYGLPVGDPNGASFSSLLASNMQMGGLVYESGSRWLPGMDLGLGSVRRSDDTWTDLAMNRMEKN
>AtDof1.8
MDTAKWPQEFVVKPMNEIVTNTCLKQQSNPPSPATPVERKARPEKDQALNCPRCNSLNTKFCYYNNYSLTQPRYFCKDCRRYWTAGGSLRNIPVGGGVRKNKRSSSNSSSSSPSSSSSSKKPLFANNNTPTPPLPHLNPKIGEAAATKVQDLTFSQGFGNAHEVKDLNLAFSQGFGIGHNHHSSIPEFLQVVPSSSMKNNPLVSTSSSLELLGISSSSASSNSRPAFMSYPNVHDSSVYTASGFGLSYPQFQEFMRPALGFSLDGGDPLRQEEGSSGTNNGRPLLPFESLLKLPVSSSSTNSGGNGNLKENNDEHSDHEHEKEEGEADQSVGFWSGMLSAGASAAASGGSWQ
>AtDof1.10
MSKSRDTEIKLFGRTITSLLDVNCYDPSSLSPVHDVSSDPSKEDSSSSSSSCSPTIGPIRVPVKKSEQESNKFKDPYILSDLNEPPKAVSEISSPRSSKNNCDQQSEITTTTTTSTTSGEKSTALKKPDKLIPCPRCESANTKFCYYNNYNVNQPRYFCRNCQRYWTAGGSMRNVPVGSGRRKNKGWPSSNHYLQVTSEDCDNNNSGTILSFGSSESSVTETGKHQSGDTAKISADSVSQENKSYQGFLPPQVMLPNNSSPWPYQWSPTGPNASFYPVPFYWGCTVPIYPTSETSSCLGKRSRDQTEGRINDTNTTITTTRARLVSESLRMNIEASKSAVWSKLPTKPEKKTQGFSLFNGFDTKGNSNRSSLVSETSHSLQANPAAMSRAMNFRESMQQ
>AtDof2.1
MDPEQEISNETLETILVSSTKGSNNNNKKMEEEMKKKVSRGELGGEAQNCPRCESPNTKFCYYNNYSLSQPRYFCKSCRRYWTKGGTLRNVPVGGGCRRNKRSSSSAFSKNNNNKSINFHTDPLQNPLITGMPPSSFGYDHSIDLNLAFATLQKHHLSSQATTPSFGFGGDLSIYGNSTNDVGIFGGQNGTYNNSLCYGFMSGNGNNNQNEIKMASTLGMSLEGNERKQENVNNNNNNSENPSKVFWGFPWQMTGDSAGVVPEIDPGRESWNGMVSSWNNGLLNTPLV
>AtDof2.2
MVFSSVSSFLDPPINWPQSANPNNHPHHHQLQENGSLVSGHHQVLSHHFPQNPNPNHHHVETAAATTVDPSSLNGQAAERARLAKNSQPPEGALKCPRCDSANTKFCYFNNYNLTQPRHFCKACRRYWTRGGALRNVPVGGGCRRNKKGKSGNSKSSSSSQNKQSTSMVNATSPTNTSNVQLQTNSQFPFLPTLQNLTQLGGIGLNLAAINGNNGGNGNTSSSFLNDLGFFHGGNTSGPVMGNNNENNLMTSLGSSSHFALFDRTMGLYNFPNEVNMGLSSIGATRVSQTAQVKMEDNHLGNISRPVSGLTSPGNQSNQYWTGQGLPGSSSNDHHHQHLM
>AtDof2.3
MATQDSQGIKLFGKTIAFNTRTIKNEEETHPPEQEATIAVRSSSSSDLTAEKRPDKIIACPRCKSMETKFCYFNNYNVNQPRHFCKGCHRYWTAGGALRNVPVGAGRRKSKPPGRVVVGMLGDGNGVRQVELINGLLVEEWQHAAAAAHGSFRHDFPMKRLRCYSDGQSC
>AtDof2.4
MVFSSIQAYLDSSNWQQAPPSNYNHDGTGASANGGHVLRPQLQPQQQPQQQPHPNGSGGGGGGGGGSIRAGSMVDRARQANVALPEAALKCPRCESTNTKFCYFNNYSLTQPRHFCKTCRRYWTRGGALRNVPVGGGCRRNRRTKSNSNNNNNSTATSNNTSFSSGNASTISTILSSHYGGNQESILSQILSPARLMNPTYNHLGDLTSNTKTDNNMSLLNYGGLSQDLRSIHMGASGGSLMSCVDEWRSASYHQQSSMGGGNLEDSSNPNPSANGFYSFESPRITSASISSALASQFSSVKVEDNPYKWVNVNGNCSSWNDLSAFGSSR
>AtDof2.5
MDATKWTQGFQEMMNVKPMEQIMIPNNNTHQPNTTSNARPNTILTSNGVSTAGATVSGVSNNNNNTAVVAERKARPQEKLNCPRCNSTNTKFCYYNNYSLTQPRYFCKGCRRYWTEGGSLRNVPVGGSSRKNKRSSSSSSSNILQTIPSSLPDLNPPILFSNQIHNKSKGSSQDLNLLSFPVMQDQHHHHVHMSQFLQMPKMEGNGNITHQQQPSSSSSVYGSSSSPVSALELLRTGVNVSSRSGINSSFMPSGSMMDSNTVLYTSSGFPTMVDYKPSNLSFSTDHQGLGHNSNNRSEALHSDHHQQGRVLFPFGDQMKELSSSITQEVDHDDNQQQKSHGNNNNNNNSSPNNGYWSGMFSTTGGGSSW
>AtDof3.1
MQDPAAYYQTMMAKQQQQQQPQFAEQEQLKCPRCDSPNTKFCYYNNYNLSQPRHFCKSCRRYWTKGGALRNVPVGGGSRKNATKRSTSSSSSASSPSNSSQNKKTKNPDPDPDPRNSQKPDLDPTRMLYGFPIGDQDVKGMEIGGSFSSLLANNMQLGLGGGGIMLDGSGWDHPGMGLGLRRTEPGNNNNNPWTDLAMNRAEKN
>AtDof3.2
MDYSSMHQNVMGVSSCSTQDYQNQKKPLSATRPAPPEQSLRCPRCDSTNTKFCYYNNYSLSQPRYFCKSCRRYWTKGGILRNIPIGGAYRKHKRSSSATKSLRTTPEPTMTHDGKSFPTASFGYNNNNISNEQMELGLAYALLNKQPLGVSSHLGFGSSQSPMAMDGVYGTTSHQMENTGYAFGNGGGGMEQMATSDPNRVLWGFPWQMNMGGGSGHGHGHVDQIDSGREIWSSTVNYINTGALL
>AtDof3.3
MMMETRDPAIKLFGMKIPFPSVFESAVTVEDDEEDDWSGGDDKSPEKVTPELSDKNNNNCNDNSFNNSKPETLDKEEATSTDQIESSDTPEDNQQTTPDGKTLKKPTKILPCPRCKSMETKFCYYNNYNINQPRHFCKACQRYWTAGGTMRNVPVGAGRRKNKSSSSHYRHITISEALEAARLDPGLQANTRVLSFGLEAQQQHVAAPMTPVMKLQEDQKVSNGARNRFHGLADQRLVARVENGDDCSSGSSVTTSNNHSVDESRAQSGSVVEAQMNNNNNNNMNGYACIPGVPWPYTWNPAMPPPGFYPPPGYPMPFYPYWTIPMLPPHQSSSPISQKCSNTNSPTLGKHPRDEGSSKKDNETERKQKAGCVLVPKTLRIDDPNEAAKSSIWTTLGIK…
>AtDof3.4
MPTSDSGEPRRIAMKPNGVTVPISDQQEQLPCPRCDSSNTKFCYYNNYNFSQPRHFCKACRRYWTHGGTLRDVPVGGGTRKSAKRSRTCSNSSSSSVSGVVSNSNGVPLQTTPVLFPQSSISNGVTHTVTESDGKGSALSLCGSFTSTLLNHNAAATATHGSGSVIGIGGFGIGLGSGFDDVSFGLGRAMWPFSTVGTATTTNVGSNGGHHAVPMPATWQFEGLESNAGGGFVSGEYFAWPDLSITTPGNSLK
>AtDof3.5
MERAEALTSSFIWRPNANANAEITPSCPRCGSSNTKFCYYNNYSLTQPRYFCKGCRRYWTKGGSLRNVPVGGGCRKSRRPKSSSGNNTKTSLTANSGNPGGGSPSIDLALVYANFLNPKPDESILQENCDLATTDFLVDNPTGTSMDPSWSMDINDGHHDHYINPVEHIVEECGYNGLPPFPGEELLSLDTNGVWSDALLIGHNHVDVGVTPVQAVHEPVVHFADESNDSTNLLFGSWSPFDFTADG
>AtDof3.6
MVFSSLPVNQFDSQNWQQMISILVFFSTSRLFKKLFLVDKNLFSCLLQGLMYNVFLTGLIFSLQGNQHQLECVTTDQNPNNYLRQLSSPPTSQVAGSSQARVNSMVERARIAKVPLPEAALNCPRCDSTNTKFCYFNNYSLTQPRHFCKTCRRYWTRGGSLRNVPVGGGFRRNKRSKSRSKSTVVVSTDNTTSTSSLTSRPSYSNPSKFHSYGQIPEFNSNLPILPPLQSLGDYNSSNTGLDFGGTQISNMISGMSSSGGILDAWRIPPSQQAQQFPFLINTTGLVQSSNALYPLLEGGVSATQTRNVKAEENDQDRGRDGDGVNNLSRNFLGNININSGRNEEYTSWGGNSSWTGFTSNNSTGHLSF
>AtDof3.7
MDATKWTQGFQEMINVKPMEQMISSTNNNTPQQQPTFIATNTRPNATASNGGSGGNTNNTATMETRKARPQEKVNCPRCNSTNTKFCYYNNYSLTQPRYFCKGCRRYWTEGGSLRNVPVGGSSRKNKRSSTPLASPSNPKLPDLNPPILFSSQIPNKSNKDLNLLSFPVMQDHHHHGMSHFFHMPKIENNNTSSSIYASSSPVSALELLRSNGVSSRGMNTFLPGQMMDSNSVLYSSLGFPTMPDYKQSNNNLSFSIDHHQGIGHNTINSNQRAQDNNDDMNGASRVLFPFSDMKELSSTTQEKSHGNNTYWNGMFSNTGGSSW
>AtDof4.1
MDHHQYHHHDQYQHQMMTSTNNNSYNTIVTTQPPPTTTTMDSTTATTMIMDDEKKLMTTMSTRPQEPRNCPRCNSSNTKFCYYNNYSLAQPRYLCKSCRRYWTEGGSLRNVPVGGGSRKNKKLPFPNSSTSSSTKNLPDLNPPFVFTSSASSSNPSKTHQNNNDLSLSFSSPMQDKRAQGHYGHFSEQVVTGGQNCLFQAPMGMIQFRQEYDHEHPKKNLGFSLDRNEEEIGNHDNFVVNEEGSKMMYPYGDHEDRQQHHHVRHDDGNKKREGGSSNELWSGIILGGDSGGPTW
>AtDof4.2
MNNLNVFTNEDNEMNVMPPPRVCPRCYSDQTRFSYFNNNKKSQPRYKCKNCCRCWTHGGVLRNIPVTGICDKSNLPKIDQSSVSQMILAEIQQGNHQPFKKFQENISVSVSSSSDVSIVGNHFDDLSELHGITNSTPIRSFTMDRLDFGEESFQQDLYDVGSNDLIGNPLINQSIGGYVDNHKDEHKLQFEYES
>AtDof4.3
MDNFNVVANEDNQVNDVKPPPPPPRVCARCDSDNTKFCYYNNYSEFQPRYFCKNCRRYWTHGGALRNVPIGGSSRAKRTRINQPSVAQMVSVGIQPGSHKPFFNVQENNDFVGSFGASSSSFVAAVGNRFSSLSHIHGGMVTNVHPTQTFRPNHRLAFHNGSFEQDYYDVGSDNLLVNQQVGGYVDNHNGYHMNQVDQYNWNQSFNNAMNMNYNNASTSGRMHPSHLEKGGP
>AtDof4.4
MDNLNVFANEDNQVNGLKRPPPSRVCPRCDSDNTKFCFYNNYSESQPRYFCKNCRRYWTHGGALRNIPVGGSCRKPKRLKVDQSSISEMVSVENQPINHQSFRQTQENNEFVRSFDASSSATVTAVPNHFGYLSELHGVTNLLPIQSFRTMDCLDFGDESFQQGYYDVGSNDLIDNPLINQSIGGYVDNLTSYCINQVEPKLQPRYEHES
>AtDof4.5
MDNLNVFANEDNQVNDVKPPPPPPRVCARCDSDNTKFCYYNNYCEFQPRYFCKNCRRYWTHGGALRNIPIGGSSRAKRARVNQPSVARMVSVETQRGNNQPFSNVQENVHLVGSFGASSSSSVGAVGNLFGSLYDIHGGMVTNLHPTRTVRPNHRLAFHDGSFEQDYYDVGSDNLLVNQQVGGYGYHMNPVDQFKWNQSFNNTMNMNYNNDSTSGSSRGSDMNVNHDNKKIRYRNSVIMHPCHLEKDGP
>AtDof4.6
MDTAQWPQEIVVKPLEEIVTNTCPKPQPQPLQPQQPPSVGGERKARPEKDQAVNCPRCNSTNTKFCYYNNYSLTQPRYFCKGCRRYWTEGGSLRNIPVGGGSRKNKRSHSSSSDISNNHSDSTQPATKKHLSDHHHHLMSMSQQGLTGQNPKFLETTQQDLNLGFSPHGMIRTNFTDLIHNIGNNTNKSNNNNNPLIVSSCSAMATSSLDLIRNNSNNGNSSNSSFMGFPVHNQDPASGGFSMQDHYKPCNTNTTLLGFSLDHHHNNGFHGGFQGGEEGGEGGDDVNGRHLFPFEDLKLPVSSSSATINVDINEHQKRGSGSDAAATSGGYWTGMLSGGSWC
>AtDof4.7
MMTSSHQSNTTGFKPRRIKTTAKPPRQINNKEPSPATQPVLKCPRCDSVNTKFCYYNNYSLSQPRHYCKNCRRYWTRGGALRNVPIGGSTRNKNKPCSLQVISSPPLFSNGTSSASRELVRNHPSTAMMMMSSGGFSGYMFPLDPNFNLASSSIESLSSFNQDLHQKLQQQRLVTSMFLQDSLPVNEKTVMFQNVELIPPSTVTTDWVFDRFATGGGATSGNHEDNDDGEGNLGNWFHNANNNALL
>AtDof5.1
MVFSSFPTYPDHSSNWQQQHQPITTTVGFTGNNINQQFLPHHPLPPQQQQTPPQLHHNNGNGGVAVPGGPGGLIRPGSMAERARLANIPLPETALKCPRCDSTNTKFCYFNNYSLTQPRHFCKACRRYWTRGGALRSVPVGGGCRRNKRTKNSSGGGGGSTSSGNSKSQDSATSNDQYHHRAMANNQMGPPSSSSSLSSLLSSYNAGLIPGHDHNSNNNNILGLGSSLPPLKLMPPLDFTDNFTLQYGAVSAPSYHIGGGSSGGAAALLNGFDQWRFPATNQLPLGGLDPFDQQHQMEQQNPGYGLVTGSGQYRPKNIFHNLISSSSSASSAMVTATASQLASVKMEDSNNQLNLSRQLFGDEQQLWNIHGAAAASTAAATSSWSEVSNNFSSSSTSNI
>AtDof5.2
MADPAIKLFGKTIPLPELGVVDSSSSYTGFLTETQIPVRLSDSCTGDDDDEEMGDSGLGREEGDDVGDGGGESETDKKEEKDSECQEESLRNESNDVTTTTSGITEKTETTKAAKTNEESGGTACSQEGKLKKPDKILPCPRCNSMETKFCYYNNYNVNQPRHFCKKCQRYWTAGGTMRNVPVGAGRRKNKSPASHYNRHVSITSAEAMQKVARTDLQHPNGANLLTFGSDSVLCESMASGLNLVEKSLLKTQTVLQEPNEGLKITVPLNQTNEEAGTVSPLPKVPCFPGPPPTWPYAWNGVSWTILPFYPPPAYWSCPGVSPGAWNSFTWMPQPNSPSGSNPNSPTLGKHSRDENAAEPGTAFDETESLGREKSKPERCLWVPKTLRIDDPEEAAKSS…
>AtDof5.3
MDHLLQHQDVFGNYNKAREAMGLSYSSNPTPLDNDQKKPSPATAVTRPQPPELALRCPRCDSTNTKFCYYNNYSLTQPRYFCKSCRRYWTKGGTLRNIPVGGGCRKNKRSTSSAARSLRTTPEPASHDGKVFSAAGFNGYSNNEHIDLSLAFALLNKQHPGSSSQLGFHSELGSSHQSDMEGMFGTSQQKENATYAFGNGSSGLGDPSRVLWGFPWQMNGESFGMMNIGGGGGHVDQIDSGREMWTNMNYINSGALM
>AtDof5.4
MQDIHDFSMNGVGGGGGGGGRFFGGGIGGGGGGDRRMRAHQNNILNHHQSLKCPRCNSLNTKFCYYNNYNLSQPRHFCKNCRRYWTKGGVLRNVPVGGGCRKAKRSKTKQVPSSSSADKPTTTQDDHHVEEKSSTGSHSSSESSSLTASNSTTVAAVSVTAAAEVASSVIPGFDMPNMKIYGNGIEWSTLLGQGSSAGGVFSEIGGFPAVSAIETTPFGFGGKFVNQDDHLKLEGETVQQQQFGDRTAQVEFQGRSSDPNMGFEPLDWGSGGGDQTLFDLTSTVDHAYWSQSQWTSSDQDQSGLYLP
>AtDof5.5
MLETKDPAIKLFGMKIPFPTVLEVADEEEEKNQNKTLTDQSEKDKTLKKPTKILPCPRCNSMETKFCYYNNYNVNQPRHFCKACQRYWTSGGTMRSVPIGAGRRKNKNNSPTSHYHHVTISETNGPVLSFSLGDDQKVSSNRFGNQKLVARIENNDERSNNNTSNGLNCFPGVSWPYTWNPAFYPVYPYWSMPVLSSPVSSSPTSTLGKHSRDEDETVKQKQRNGSVLVPKTLRIDDPNEAAKSSIWTTLGIKNEVMFNGFGSKKEVKLSNKEETETSLVLCANPAALSRSINFHEQM
>AtDof5.6
MGLTSLQVCMDSDWLQESESSGGSMLDSSTNSPSAADILAACSTRPQASAVAVAAAALMDGGRRLRPPHDHPQKCPRCESTHTKFCYYNNYSLSQPRYFCKTCRRYWTKGGTLRNIPVGGGCRKNKKPSSSNSSSSTSSGKKPSNIVTANTSDLMALAHSHQNYQHSPLGFSHFGGMMGSYSTPEHGNVGFLESKYGGLLSQSPRPIDFLDSKFDLMGVNNDNLVMVNHGSNGDHHHHHNHHMGLNHGVGLNNNNNNGGFNGISTGGNGNGGGLMDISTCQRLMLSNYDHHHYNHQEDHQRVATIMDVKPNPKLLSLDWQQDQCYSNGGGSGGAGKSDGGGYGNGGYINGLGSSWNGLMNGYGTSTKTNSLV
>AtDof5.7
MSSHTNLPSPKPVPKPDHRISGTSQTKKPPSSSVAQDQQNLKCPRCNSPNTKFCYYNNYSLSQPRHFCKSCRRYWTRGGALRNVPIGGGCRKTKKSIKPNSSMNTLPSSSSSQRFFSSIMEDSSKFFPPPTTMDFQLAGLSLNKMNDLQLLNNQEVLDLRPMMSSGRENTPVDVGSGLSLMGFGDFNNNHSPTGFTTAGASDGNLASSIETLSCLNQDLHWRLQQQRMAMLFGNSKEETVVVERPQPILYRNLEIVNSSSPSSPTKKGDNQTEWYFGNNSDNEGVISNNANTGGGGSEWNNGIQAWTDLNHYNALP
>AtDof5.8
MPSEFSESRRVPKIPHGQGGSVAIPTDQQEQLSCPRCESTNTKFCYYNNYNFSQPRHFCKSCRRYWTHGGTLRDIPVGGVSRKSSKRSRTYSSAATTSVVGSRNFPLQATPVLFPQSSSNGGITTAKGSASSFYGGFSSLINYNAAVSRNGPGGGFNGPDAFGLGLGHGSYYEDVRYGQGITVWPFSSGATDAATTTSHIAQIPATWQFEGQESKVGFVSGDYVA
>OsDof1
MEVAEGRTVAAAAAGGGGLGGGARTEAEGLACPRCESTNTKFCYYNNYNLAQPRHFCKACRRYWTRGGALRNVPVGGGTRNKVAPAPCTGRRKRAAHAAHAAAPPPTTTASSAPLPLMPPAVAYELPFLPPPPPLPLAAVDPDRRLLDLGGSFTSLLAPAQLHNGHFTTGFLLGTMSSAPPPPPPPATSTPSPAPAAHPPVSDSIWAMGWPHLSI
>OsDof2
MCDKDPGIKLFGRVIPLAPEAEAAAAADGSDQPEAAAAAAAEVEPAAQDEDHHKETEERKYDEMKVDVPQEEEDNEMKVDAPQEKKDNEVTADVPEEKGNDEMRVDASESIESIEPVSRSTLDNKKEDQGQMNNVEEKAASDSKDENEKTANDESGQDKVLKKPDKILPCPRCNSMDTKFCYYNNYNVNQPRHFCKNCQRYWTAGGTMRNVPVGAGRRKSKSSSLHYRHLLMAPDCMMGSRVEISKSMNPEAFASAHSTPIQPIGRNETVLKFGPEVPLCESMASVLNIQEQNGTNAAAVPTGENQEDNSCISSITSHNVLPENAAQVDKNSTPVYCNGVGPVPQYYLGAPYMYPWNIGWNNVPMMVPGTSMPESASQSESCSTSSAPWMNMNSPMMPV…
>OsDof3
MAALRQGDDPAIKLFGRTIPLLLDPPAAAAAAADEVMPNLGNGVKTNNDLPLVSDKLLIVKGIPFCPNNSKKNDLQGISRPDGRIEIDSMTEDVKTEPDGSVPEKILKKPDKILPCPRCNSMETKFCYFNNYNVHQPRHFCRNCQRYWTAGGAMRNVPVGAGRRRNKHVSKYCQAMMTCNNTVAPGDVSDVVHHQVITHGSSLLPATLKENETPTEFISEVPPCKSSASILDIGEPNDTDLVPLASGDNKEEKSCASSVVVSSCSENLMPDNAIMKEPNNRSGCCNGVALPFPTGPALVLPWSLGWNSVALMPATQCSMQPVLGLKDGIPCPPSWPPQLMVPAPGICTPVVPIPLVPPLWSCFPGWPNGMWNAQCPGGNTTVLPSTAPNKISCSGSSSL…
>OsDof4
MANLPSTAAAAAADASGFKLFGKVIQPDGQRGVEESAAAQAPPHPHPPAPPVMEAAAAAAGTSQTLQAAGGGGGGGGGGGGEPLPCPRCGSRETKFCYFNNYNVRQPRHLCRSCRRYWTAGGALRRVASASPGRRRPRPSAARSAAAAAASASAASPPAAVPAASEGAESVDSRS
>OsDof5
MLSHVEMAPAAGGFKLFGKVIMQCGVSEGTQDKAQGFVVAREKVEPEEEEEEEQRVPAAATSGQRASIKREAADRDEEQRQGGGDAAGQPTQRRLQDSAEARAAAAAPLPCPRCRSRDTKFCYFNNYNVNQPRHFCKACHRYWTAGGALRNVPVGAGRRKNRPLGPLAVAHHNHHHRAAAGFVLGFPNPSSPTSPSPVYTDRWPVTPDRPF
>OsDof6
MLPYAPRPPSLLVDRRYKQGAEAAPNCPRCDSPNTKFCYYNNYSLSQPRYFCKGCRRYWTKGGSLRNVPVGGGCRKNRRGKSSSSARSAADAVSSGRDAAFGHRFPGPVRPDMVLEGMVGNPANPGQAMPDVAAAADGSTIDLAMLYAKFLNHPPTDAGLGAVTPESGGHVDEAFDTFSASSDLSPGILAAASAQFDPNQDGFGEWSSPASGNDPTSTATTATTSMLCTDASVQAALGELNFAMDQSCFDSLGLPTDVAGAGSLSSWCSIVPSLSTWEEPKYDSLDSFPDDAMSLHECMIGAPDHDWSVDCQGLEALYMP
>OsDof7
MASGGALSPVEEKPTVVKTTKAEQHEEEAAVAVKSAAEMMKKSSPCCPRCNSIKTKFCYYNNYSMAQPRYFCRECRRYWTQGGSLRNVPVGGGCRKSKRSSASSASASAASPPAPAVGAAPPVVPALSSAISKLLQSEPMAAPCADFPNVLPTFVSTGFELPAAAGDRLSLGSFGAFGNLSAAVAAPGGGGGSSTTTSFMDMLRGVGGLFDGVGNSHQMGGNGGGGGSYYAPLITGAGNGMLMPPPPLPPFSGSLMQHGMQGLFANHAMGGGGGGVMNAGEDGSVMAGLGGGQWPPALGGADEQQGGGDGGEAVMTKDTGGGASSSASRPDYFYGWNSAAGGVVAGGGIGGNAAAATGATPWQGLIDSSSAMM
>OsDof8
MDAAHWHQGLGLVKPMEEMLMGANPNPNGSSNQPPPPPSSAASAQRPIAPPAAGAAAGAGAAGAGAGTERRARPQKEKALNCPRCNSTNTKFCYYNNYSLQQPRYFCKTCRRYWTEGGSLRNVPVGGGSRKNKRSSSSVVPSAAASASTSAAVSGSVPVGLAAKNPKLMHEGAQDLNLAFPHHHGRALQPPEFTAFPSLESSSVCNPGGNLAAANGAGGRGSVGAFSAMELLRSTGCYVPLPQMAPLGMPAEYAAAGFHLGEFRMPPPPQQQQQQQAQTVLGFSLDTHGAGAGGGSGVFGACSAGLQESAAGRLLFPFEDLKPVVSAAAGDANSGGDHQYDHGKNQGGGGGVIGGHEAPGFWNSSMIGNGSSNGGGGGGSW
>OsDof9
MMAGAPPMHICMDSDWLKGIVPEEHGMGSSSPSAELIACPRAPMQAAAAAADRRLRPQHDQPLKCPRCESTHTKFCYYNNYSLSQPRYFCKTCRRYWTKGGSLRNVPVGGGCRKNKRAPPKKAAAHAQPAVAVAAALQGRHMETGLHLSFSGMQHHLAPPPPAAATAADPLCSLGLFDWKQYDPVFAGSGGGGSPVAALESAGGSEAQFMGAGMMGIGGGGVAEYHALSALRFAAGLGDHLALPFGAVRAEHDAVEVKPVAAERLLSLEWCGEASRTAAPESSISSLGGLGLWSGMIGGGHHHHGSSAAI
>OsDof10
MQEFQSIPGLAGRLFGGAAAADIRRAQAQQGPASRCGGIPSPEAVKCPRCESTNTKFCYYNNYNLSQPRHFCKSCRRYWTKGGVLRNVPVGGGCRKTKRSGSSSAASSAPSTPTAATDNAKNQRRASASSPRSSSGGSGNTSPTAAAATTPTTPATPSSNTIAVINHATTTTTTTNPFPTDVPPPAPIFADQAAALASLFAPPPPPPLPVFSFAAQAKTEDGIASVLLAGQTTAPTAATVADMTPFTSLDAGIFELGDVPPAAYWNAGSCWTDVPDPNVYLP
>OsDof11
MGECKVGGGGGGGDCLIKLFGKTIPVPEPGACAAGDVDKDLQHSGSSTTEPKTQENTVQDSTSPPPQPEVVDTEDSSADKNSSENQQQQGDTANQKEKLKKPDKILPCPRCSSMDTKFCYYNNYNINQPRHFCKNCQRYWTAGGAMRNVPVGAGRRKSKSVSAASHFLQRVRAALPGDPPLYAPVKTNGTVLSFGSDLSTLDLTEQMKHLKDKFIPTTGIKNTDEMPVGLCAEGLSKTEESNQTNLKEKVSADRSPNVAQHPCMNGGAMWPFGVAPPPAYYTSSIAIPFYPAAAAAVAAYWGCMVPGAWNAPWPPQSQSQSVSSSSAASPVSTMTNCFRLGKHPRDGDEELDSKGNGKVWVPKTVRIDDVDEVARSSIWSLIGIKGDKVGADHGRGCKL…
>OsDof12
MVFPSVPAYLDPPNWNNQQGQPPRPANVGGGDAQHLPVGPTAAAAAPGEIGGLPTSSSSASAAAAAAQQARPNSMAERARLARAPQPEPALKCPRCDSTNTKFCYYNNYSLSQPRHFCKTCRRYWTRGGSLRNVPVGGGCRRNKRSGKSSSAAAAGASSSSSKPSSSAARQLPGGGASPMPSAAASTQPGGAAAGAIIPPSGLSSMSHHLPFLGAMHPPGPNLGLTFSAGFQPLGGMHHHVDTADQFPVASGGGATIGASLEQWRVQQQQQQQPQQHQFPFLGGALELPPPPPMYQLGLEATRAAGTGATAAAAFTLGQTSATATTSRQEGSMKLEDSKGLEMSLQRQYMAALRQGDGVWGNNNGGNGGSDGGGNGGGGSWTMNFPGFHSSSGGGGDDG…
>OsDof13
MAPAAGDDAVVPRKGAGGGGTTTPPPPPPAQQQQQQPLPPPPPQEQGLRCPRCDSPNTKFCYYNNYSLSQPRHFCKTCRRYWTKGGALRNVPVGGGCRKNKRSRSAAAASRLSLNLPTVEGIGGAAADPAAAAAARLGFLGGGTTMMMSSSTSPLGGAAAAVADFQQGGAVGMLPLPRLQSPAGGGVGHHQYVPFGEWPSGDIAGGNAVNGGGGHGAVSSTIASSIESLSFINQDLHWKLQQQRLATMFLGPPGSASAAAAAAQANDGGGNGAQATASGHAAGGGGGAFMHMAGSVPSMEAAMPSATSWFMDSCSYGLPSPPPPATAAVAATTSSNLNSGGRSSGGDDNATSNCGSAIPAWGDISTFAMLP
>OsDof14
MPGQVMEAALQQLPASMASGSLLLPPACLQHPLPAAAAASGGVGGSSREQCPRCASHDTKFCYYNNYNTSQPRHFCRACRRYWTLGGSLRNVPIGGSTRKRPRPPVRRPPVHFTAAAAAAAAAAPPHHHHHHHGGPLTPPPATSSSSQQAGLLGSLFALGAAPLLEGRVGVGFDLGLGLPGPGHHHAVAGGGGPAAAVATSSSSSAAAPLLWPTGLLDSSSNNAETWRMAAGGMWPEFTAAAAQNIRLVIDIGDTTIQVPLNGPTVVQNIGRQAAAAVAGDSSAGGVSEKTGGAGGGGGEEWMQEQDGLLCMRGRRCGRRGGCLPRPRDWFAALLAADPAAAAVTRDQAGKAMLYLIVNTCTFATSLAVLPDAVRRRRRLRVEEGHRVADHQHDDGRRA…
>OsDof15
MIQELLGGTTMDQLKGASALNHASLPVVLQPIVSNPSPTSSSSTSSRSSAQATQQRSSSATSSPHGQGQGGGAAEQAPLRCPRCNSSNTKFCYYNNYNLTQPRHFCKTCRRYWTKGGALRNVPIGGGCRKPRPMPAPVAKPPMSCKAAPPLGLGGGPVSWASGQQAATAHLMALLNSARGVQGHGGSNVHRLLGLDTMGHLQILPGAPNGAGAGTAASLWPQSAPRPVTPPPPHMDSQLGMGTLGHHDVLSSLGLKLPSSASSSPAASYYSDQLHAVVSNAGRPQAPYDVATASLPCTTAVTSLPSALSSVSAAAPTSNTVGMDLPPVSLAAPEMQYWNGPAAMSVPWPDLPTPNGAFP
>OsDof16
MPPHHGGLMAPRPDMVAAAVAASGGGGGGGGPTGGTAVRPGSMTERARLAKIPQPEPGLKCPRCESTNTKFCYFNNYSLSQPRHFCKTCRRYWTRGGALRNVPVGGGCRRNKRTKSSKSSSSTSAAGSASATGGTSSSTSSTATGGSSSAAAAAAMMPPQAQLPFLASLHHPLGGGDHYSSGASRLGFPGLSSLDPVDYQLGGGAAAAAAIGLEQWRLPQIQQFPFLSRNDAMPPPMSGIYPFDAEAAADAAGFAGQLLAGTKVPGSSGLITQLASVKMEDSNAQSAAMNSSPREFLGLPGNLQFWGGGNGAGPGGNGDGATGGSGAGVAPGGGGSGGGWADLSGFNSSSSGNIL
>OsDof17
MDAAHWHQGLGLVKPMEEMLMAANAAAGANPNPAATAPSSVTGGALRGGGGGGAPPVAGGAGAGSTERRARPQKEKALNCPRCNSTNTKFCYYNNYSLQQPRYFCKTCRRYWTEGGSLRNVPVGGGSRKNKRSSSSAASASPASASTANSVVTSASMSMSMASTGGGASKNPKLVHEGAQDLNLAFPHHGGLQAPGEFPAFPSLESSSVCNPGGPMGTNGRGGGALSAMELLRSTGCYMPLQVPMQMPAEYATPGFALGEFRAPPPPPQSSQSLLGFSLDAHGSVGGPSAAGFGSSAGLQGVPESTGRLLFPFEDLKPTVSSGTGGGGASGGGAGVDGGHQFDHGKEQQAGGGGGGPGGHDTPGFWNGMIGGGSGTSW
>OsDof18
MAPAVASSPSLVLSAAAATASNKRPADSDASPPHQGDRTGQQEKKQQQLECPRCRSTNTKFCYYNNYSTSQPRHFCRACRRYWTHGGTLRDVPVGGASRRGGGGKRRRVSADADPSSASPPPPTTSTTDAYADLPAGFPFLSDGAFLPQFGLAGVAPAAFSWASAVPDLYNCGIAPWDDGTAVTGAAWDNFADIAGLDLSWPPPGN
>OsDof19
MIFPPAFLDSSSWNDNNNNNHNQQQQQQHAHGHHQHHQVAAGCGGGGGGGDGNSHELLQQQSMIPGTLADGGGGGGAVGPAKPMSMSERARLARIPLPEPGLKCPRCDSTNTKFCYFNNYSLSQPRHFCRACRRYWTRGGALRNVPVGGGYRRHAKRAKPKPASAAGSASAATTTAGSTPAGSTTTTTTSSTCATPNAPALPAMLGGNLSILPPLLRLADFDAMSLGSTFSGMAAAAGKPPPVDAAGCYSVGAATGLEQWRLQQMQSFPFFHAMDHQAAMAAPPPAMAMPGMFQLGLDGDGHGSGGGEDGGELHHAMPSSKREGYPRGMYGDHHLAGGYTSYSSATTGNHLL
>OsDof20
MLSSHCESMLAYAAAAGRRAVVVDHHQRRYRPNVEVAPNCPRCESPNTKFCYYNNYSLSQPRYFCKGCRRYWTKGGSLRNVPVGGGCRKNRRGKAVRAMVGETMTARGGGGGGAAAFSHRFHGPVRPDMILEGMAGSTAASAGLGEQPGVAAPDEKPAAADGSTIDLALLYAKFLNHHQPTMAEQGGGAAVPESVDTSSGSSSDRTTSPAAAQPAAAAAYGPGQDGLVGEPISTEEHGAAAMARCAQALGELNFSVDQISCYTSLGLPTTDGGDLILPSTLDQHAKYEPFDSLPEDALSLHDIISGDDDVWCNALGCQGLEAALCRP
>OsDof21
MQEFHPVPGLAGRLFGGAAAAAAVAAVEEVRCPRCDSSNTKFCYYNNYNLSQPRHFCKACRRYWTKGGLLRNVPVGGGCRKPKRPAPPPSSSFTGGGGGGGGCGHRDSKSARSAGGGGDGSGSTASATATPAAAPASSNTLSAAVSQPSSVDALSPPPAPMFADQATAFASLFAPPPPPPSQALPAFASFTAQPKAEEDVADAPALAATEQHRSSSAASFAAHSISPPFAAARSSDGPAAAAAAAAADWAPPTAVLDAGMFDLAGAIGGDTSYWNAASWTDHDGTIYLP
>OsDof22
MTSASLLLAPRSPDMAAAGILPVSGGGGASSARPVSMAERARMAKIPQPEPGLKCPRCDSTNTKFCYFNNYSLTQPRHFCKACRRYWTRGGALRNVPVGGGFRRNKRGTKPSNSKKPAAAVAGGVMAPPHAQLQLPFGFDGGGGGGHGSIIGGGGGGGASRLGFPELSSLHAAAAVDYQLGGGGGGDGLGLERQRLPHFPFLARSNAAVHPPPLMSTAAGVSYPFGDVAAGGLGGDMPANAASVAGSAGLITQMASVKMDDIDNHPPPSAATTTASSPIEFLGLRGSLQFWGGGGGHRGGGDGAGGSAAPGGGGGGWSDLPAFDLSTSGNIL
>OsDof23
MAGAGGAATAAAGGGGGGGVAAGRSGGGGGGGAAAAAGAGAPDPRAEALRCPRCDSANTKFCYYNNYSLSQPRHFCKACKRYWTRGGTLRNVPVGGGCRKNKRSRSGGAAPGGGVGRGGPGGGAAAAVSSAGGGAAGTSPASSLALPQPGSLPSLSSALGLTGGTSLASLLLGSGGSGGDHLGLFQAMQSVVSDAAAFEMHQQHQSQVDHLLGLGYGAAGAQIQAAKPWLHDGGATGGLLDGFYAPLLSGSIVPGLEELQVKAEATTGDHQQKSSAAAAGEQSWDLPTPSSSNVEASIIASDALMAAAAASMNPAVSAAAASTAPSAQSLLYWGNGGIGAAAAAWPDLANCGSSIATLF
>OsDof24
MDDLAAASPPHPPPPPPESHVPPPPQTPEKDSCEDTGDMRISEEKPCTDQELDADQMNSSSFNSSSECENQTPSNDEMTGSESKSEAAQTEGGGSSEEKVLKKPDKILPCPRCNSMDTKFCYYNNYNINQPRHFCKSCQRYWTAGGSMRNLPVGAGRRKSKSSTANYRSILITGSNLAAPAGDAPLYQLSIKGDQTATAVKFAPDSPLCNSMASVLKIGEQSKNAKPTSTAQPRNGETQTCPASGTTSDSPRNEPVNGAVSGHQNGIVGHSGVPPMHPIPCFPGPPFVYPWSPAWNGIPAMAPPVCTAPAEPANSSDNGSTASVQWSMPPVMPVPGYFPVIPSSVWPFISPWPNGAWSSPWIQPNCSVSASSPTSTSTCSDNGSPVLGKHSRDSKPQGD…
>OsDof25
MQEQQPETGRRPAQQFATVDLRRPKGYAAAPATPQPGSAATAAAAAGPAATAAAAAAGEGDPCPRCESRDTKFCYYNNYNTSQPRHFCKCCRRYWTKGGTLRNVPVGGGTRKKSSSSSSSSSSSSAAAAAPAAKRQKTSKKRRVTTPEPLAATTPVLTEAAADSAAKTTTEATSEKKTTTSTTTTTPPAPDTTSEITTELVVPAVEEDSFTDLLQPDSAAVTLGLDFSDYPSITKSLADPDLHFEWPPPAFDMASYWPAGAGFADPDPTAVFLNLP
>OsDof26
MQEAGRRPAPQFAGVDLRRPKGYPAAAQLTPAAEEAAAGVGDPCPRCESRDTKFCYYNNYNTSQPRHFCKSCRRYWTKGGSLRNVPVGGGSRKSSTSSSSAAAAAASSSSSPSSPAKSPKRSKNSKRRRVSPPPPQPVPAPPPPTTADAADVAAPTAPEATTKKAPEDLTAAAATQPAVALGLGVADGGGGGKEHLDTSPFEWPSGCDLGPYWPTGVFADTDPSLFLNLP
>OsDof27
MGECRGGGGGGDGLIKLFGKTIPVQPDAKDVQQHSGSSSSSTESDVQETAAVAVADPSPRSEVVDGESPPQPGGEAASHQQQQKEMKLKKPDKILPCPRCSSMDTKFCYFNNYNVNQPRHFCKHCQRYWTAGGAMRNVPVGAGRRKNKNATAAAHFLHRVRACAAAAAMPAAPHDATNATVLSFGGGGGGHDAPPVTLDLADKMTRLGKEGLVAHARNADAAAACSEVSSNRDDEQIGNTVAKPANGLQQHPPPPHHHHHSAMNGGGIWPYYTSGIAIPIYPAAPAYWGCMIPPPGAWSLPWPATVQSQAISSSSPPTSATPSVSSFTLGKHPREGGDHEARDHHGNGKVWVPKTIRIDNADEVARSSIRSLFAFRGGDKADDNNDDDGTGVHKLATTV…
>OsDof28
MSSPFLGSSSSSASSPLSYLTPPRPPPPPPPLLMGQGYAAAANGGIGGGGVEAVNAAAAPRQGGRHAGHPPLPRPPPRQCPRCGSANTKFCYYNNYSRTQPRYLCKACRRHWTEGGTLRDVPVGGGRKNSKRAAGGGKAGATASTAASAHVVAPAAAPPTSSSFPDLLRQMLMAPATAGGGGGYSIDLTAWQQMAAFAAPPQAATGDVGGAVGAASTAAPDANCGGGGVQYWNGWLQDDMPGLDGSC
>OsDof29
MVFSSLPIFLDPPNWTQMQQQPLQCLIGGGGSDHHHLMPPPSGLAPLPSAAGAADTAASAPAAAAQQQQPRPAVVSMSERARLARVPLPEPGTLRCPRCDSTNTKFCYFNNYSLSQPRHFCKACRRYWTRGGALRNVPVGGGCRRNTKRSTKKSSSSSSRQGGGAGNAAAAATSSSSTTSTSTTATTSSAAAAAAAAAADVIASMQAGGALLPHHLIGGLPSSAAAAAALEASLEGYHHHHHAHGHQLPFLQPPPFLQQGLHGYHFADGDVAAGAALADGGFPRGVASGLLAQLASVKMEEHGTNNGGGVGGGFVGAHEQYWHGGNGGGGWPAEFLSGFSSSSSGNVL
>OsDof30
MEAPLHQSPVPLLPPPPPPPRVVGVQQQQQQEAVVPPPPAMAAAAGGGGREQCPRCASRDTKFCYYNNYNTAQPRHFCRACRRYWTLGGSLRNVPIGGSTRKRPRPSRPARAAVAAAIAAAAAASASGSQIAAQQQQAPPVVMSQHEAAAAAAAASGGGGGDGLLVSLLGAAPVLEGRLGGGIGVDLLGGEQLGFGAMAMPPAPLLWPARVLEGGDAWKSAAAAAGVSYSPFPALWQELAAAAPVELAGGGGLLRHGGGGAPQLM
>VcDof1
MTEVKDLAIKLFGKTIPLLPKHNVSVSASPRKGNCDRIVDEEEDGEKPSESELTGTREEDDSKDTETSCDNHPKTPSVEKETSISQEKTLRKPDKILPCPRCNSMETKFCYYNNYNINQPRHFCKKCMRYWTAGGTMRNVPVGSGRRKNKSSCDSHYRHIMVSECLQAARANGTVLSFGADSQPLCESIALNAFENSQHLVKISISGGGRRENGDDDTRRSSSNSAENPVFHQSVAKNLPYFGRPPCFFPWTSPQWRSGIPPPVLGPGVFPIPFYPPPPYWACTTLPGSWNVPWIPPSASSTLGKRLRDGSEKEEPLIENDFARGVLIPKTQRVESSMLSTLGIKNEKNDPTNAGGGLFKAFHFKGEEKTCAYDTYLALQANPAAMSRSLNFRESVNEC
>VcDof2
MQDIHPIGGGGGGRFFGGGGGGVDRRLRPNIHQNHQSLKCPRCDSLNTKFCYYNNYNLSQPRHFCKSCRRYWTKGGVLRNVPVGGGCRKTKRSKPKPSSSKNKSNSRSSSESSSLTASTTATKPPLATPTATASCSTSTPSTLLNFPDSRFFNFPVDQSTDGGVFTEIGSFTSMMTSTNDHSFLGFNVGGISGTDYRLQRENEGTVVRDESSEHQWDQQQQKMEELSAGFLDRTVPIDLPGMENRGCNGEVGALDWGGGGDQAMFDLTGTVDHAYWSQTQWPDNDHSLYLP
>VcDof3
MVFSSIPAYLDPSNWQQQPNLQPGGISNGNTQFLQSVPPGGGVGSIRPGSMVDRARMANLPMPEAGLKCPRCESTHTKFCYFNNYNLTQPRHFCKTCRRYWTRGGALRNVPVGGGCRRNKRSKASNSSKSPVTSDHQKTSTDSSTKSTMSGLPPQIPPQIPPQTSFLSNMSQLTEFDVGDTGLNYSGISAPVVATSGMNFQVGNNSLGGVEQLQPTPSSFGFDVPAGLYPFQGGLEPSGYVTEGSNVVQPKLPTSMKLEENSKEFNLSRQFLRIQGNDQYYWSPAASTVAWTDLSGFRSSTTNNP
>VcDof4
MDQGRLTREEEEEEEMVKQQQQQQQQRRVIKPPENNQQVHHHSQHPHKCPRCESLNTKFCYYNNYSLSQPRYFCKACRRYWTQGGTLRNVPVGGGCRKGKRSKASSSGVGESSRSQTSQPPPPPPPHELQALPNLATKDLANLGMPPMSLPYYSGGGFLSSLAAMQSLSQPQIPFNQPLNIGGQYGRSPNMALLQGLNLPSFSSQQHAQNQQQNEFYQMGNQNLMQPNRALGSWDQNLINTSSANPTASINPSGSTLNQNQWPDLP
>VcDof5
MVFSSIPAYLDPSNWQQQPNLQPGGISNGNTQFLQSVPPGGGVGSIRPGSMVDRARMANLPMPEAGLKCPRCESTHTKFCYFNNYNLTQPRHFCKTCRRYWTRGGALRNVPVGGGCRRNKRSKASNSSKSPVTSDHQKTSTDSSTKSTMSGLPPQIPPQTSFLSNMSQLTEFDIGDSGLNYSGISAPVVATSGMNFQVGNNSLGGVEQLQPTPSSFGFDVPAGLYPFQGGLEPSGYVTEGSNVVQPKLPTSMKLEENSKEFNLSRQFLRIQGNDQYYWSPAASTVAWTDLSGFRSSTTNNP
>VcDof6
MADVHKAQGIKLFGATIAVQVREAKEEPTQSGDQNSISEKRPEKIIPCPRCKSMETKFCYFNNYNVNQPRHFCKGCQRYWTAGGALRNVPVGAGRRKNKQPCRGFNSGFSAESCFFYTSSGHGVQLLDFDGMVEDWQLAAAHGGFHHVFPGKRRRTAASGGQSC
>VcDof7
MLSNKEMLRLIPSSTTNQWPQNQIDEQKEMMVSRVMEKPNQEPNQNHHQQQPPPPQALKCPRCDSSNTKFCYYNNYSLSQPRHFCKGCKRYWTRGGTLRNVPVGGGCRKNKRVLIKRSSSSTSSSSSIDAHAAAPTSSSPTPPTSNPNHLHHHLLQTHLNISPSSSNPLFYGLPTNPTSSDLMTATAHHSLYPSFFSSARVSSHGFDLQAQLNGLGLGIDPIHKTIQNPLLSSYSLFGSSTNNNYPTMASLLASSLQEQKFKEEAAGTTANFRAPYQEEDVTRNNNNNGEVKVEQGPKKLDWNTMNGSNFQNQIIDQQVSSQTDPSLYWNHAISFGGGGPNWLDPSLNGPSAHSLI
>VcDof8
MGLSTKQVSSDHGLDWGQSLLQSSTSGALELPSKPLPARRHQSQHQPEPVACPRCASTNTKFCYYNNYNKSQPRHFCKACKRHWTKGGTLRNVPVGGGRKNKRLKTSNTTTTTTTTTSAATTATPNPSTQLANKREQLSQSFSQGEAQDKISEILYQALVPPGGNFNAKSYSGNNHVGTIGINGKLLDESHKQVPPACHKHLQ
>VcDof9
MDPSSAPHHQMGTQTLESMLVCTKANQDQKKPRPQPEQALKCPRCDSTNTKFCYYNNYSLTQPRYFCKSCRRYWTKGGTLRNVPVGGGCRKNKRSSSSSSSSKRSQDSSLSTPIPSPLSSSTFPPLSYDYSSDLSLAFSGLHKQANGNIGFDGHDHHDFSTLGNHHNISQCDFLGNPNHVGNVHSSSHHSTPASSFLDALRGGFVEAPNGFQNLNYGMGINGNYMGNLENGGEMAMPYDHQDNVSCATTTAVTVTTMKQEMCNGREGGENRVLWGFPWQIGGEGNNMGEVVDSGRDRWNISGIGSNWHGLLNSPLM
>VcDof10
MVFSSIPVYSDHPNWHQVQQGSLNENSQLQQPPPLQVGGGSGGSGGGSSIRPGSMVDRARLAKVPQPEAGLNCPRCDSTNTKFCYFNNYSLTQPRHFCKACRRYWTRGGALRNVPVGGGYRKNKRSKSNSSNNSSKSQASTGAKSTSVSPSPSSCTHFPQPSPQFSFMATLQGLGQYGGGNVDSNIAGFQAQMAAGGGDLGFQMGNNSGGISSNLLVGGVEQWRLPFLGGLDHQQPTNYQTPVKMEESHGLNFSRQFIGGGLENNQYWSGNQWAEFSGVNSSSTSQML
>VcDof11
MPSDSADQGPTRPQHGPNHQPEPEALPCPRCTSTNTKFCYYNNYNLSQPRHYCKSCRRYWTRGGTLRNVPVGGGTRNHGKNPNNSNKKRPRTAAKTADTPTSFPPSSHLTYDPVHLDPITQIPSSFGVNLNEKVPEAVEGDYAPFVNLNGGGFFGLGGYGIGFRELGFGLSSGIWAVEDPAMEDVSCGNGGEVGGDGGGGMEGRLGDGSCFGWPDLAVSTPGEGHK
>VcDof12
MLEAKGDPAIKLFGKTIPLVEIPPPASVGADSATPVRPSDIPVDGSIDQNRPNSPEGSNNSDGIGEDREPDKAVSGVLSDAKQEDGGRPITSEDIADPNSSAGVNDKPKTPSVDNEASTSKTEEDQNETSNSQEKTLKKPDKILPCPRCNSMDTKFCYFNNYNVNQPRHFCKNCQRYWTAGGTMRNVPVGAGRRKNKNSSSHYRHIAIPEALPNGIHHPNLNANGSVLTFGSETPLCESMASVLNIAEKTIQNHAQTGFCKPEELIISVPYGVGEKRDEHLSQSSFIAANSKEEIGTSVPQDPRMQNCHSFPPQMPCFPGAPWPYPWNSAQWTAPAFFPPGFPMPFYPAPPYWGCTLPSTWNVPWVTPLTSPPIQTVPNSPTLGKHSRDENMITKPSSG…
>VcDof13
MFQELLGGASLIGGERKPSLSNPFEPSPSPSPSPSPSPSSSTTTAAATTPATSSPAGENQNLRCPRCDSSNTKFCYYNNYNLTQPRHFCKTCRRYWTKGGALRNVPIGGGCRKNKSIVSIASSVNGKSSGGGRFIKTVSADQMGKPGFGGGFEQDHQIPFNPVLWASSAQNSHLLALLRATQNPNPNPNPSQLSNLFGSHLTSGSESMGATEALSSYWRNNQNQAQQPHPNHQQHQIGVVLGEVQNSGIHDFYQRLRATANYYPHEHQPPVLLSTTTSSSSSTAVLESAPVSAAAEMAYWNPTLTWSDLQTTTNGAYP
>VcDof14
MKDTAIKLFGKKIALPENGWNPAVSGDDSGGYSDGKSCDDRSWAISACLGDKKVSSRTGDEEEQSEEEEREVVAAADEDDDDKDIFEGNPTESKQSGDTNQEQLPESDHDNPKTPSIDDENATAKAPKRENDQTDPNNPQQKPLKKPDKILPCPRCNSMETKFCYYNNYNINQPRHFCKNCQRYWTAGGTMRNVPVGAGRRKNKNSAPRFAHVTIPEALHGIRIDATNGIHHPNVKPNGTVLSFGPELPLCESIASVWKLAEKKGSNGGENVDDSSSGSSVTTSNSVAEGARNGFIQEPIMRNLNGFSSQIPCLPGIPFPYPWNTAVAVPAFPMPFYPPPPYWNCNVPGAWTVPWFPAPNSQTLGKHTRDGELLKPSYPEGKESEQQKNSNRSVLIPKT…
>VcDof15
MYTDIDHEMLQFPPRPLVMERRWKSNVEVAPNCPRCASPNTKFCYYNNYSLSQPRYFCKGCRRYWTKGGSLRNVPVGGGCRKSRRSKAASRPSVDDRGVSAISLDICPSPPSSLTGGPNGSGIDMAEVFAKYLNPNSSNGLDFTGTPDQVAEESDPFVLGISHGFSGSDPSREEDQIQEFSGEDPICFDMVSDELDQELLWSEAATTTFPNFEWQPTVEMQELESFSTVDDQSKISANIIGDNWSMFDLSAYL
>VcDof16
MLSNKEMLRLIPSSTTNQWPQNQIDEQKEMMVSRVMEKPNQEPNQNHHQQQTPPPQALKCPRCDSSNTKFCYYNNYSLSQPRHFCKGCKRYWTRGGTLRNVPVGGGCRKNKRVLIKRSSSSSSIDAHAAAPTSSSPTPPTSNPNHLHHHLLQNHLNISPSSSNPLFYGLPTNPTSSDLMTATAHHSLYPSFFSSARVSSHGFDLQAQLNGLGLGIDPINKPIQNPLLSSYSLFGSSTNNNYPTMASLLVSSLQQQQKFKEEAAGTPANFRVPYQEEDATRINNNNGEVKVEQGPKKLDWNTMNGSNFQNQIIDQQVSSQTDPSLYWNHAISFGGGGPNWLDPSLNGPSAHSLI
>VcDof17
MGLSTKQVSSDHGLDWGQSLLQSSASGALELPSKPLPARRQQSQHQPEPVACPRCASTNTKFCYYNNYNKSQPRHFCKACKRHWTKGGTLRNVPVGGGRKNKRLKTSNTTTTTTTSAATTATPNPSTQLANKREQLGQSFSQGEAQDKISEILYQALVPPGGNFNAKSYSGNNHGDFLSSISTLPLVQNQTLLPFTFSSLGSFESNPSSISTSFRSPNGFDFIGGLGSMEETATMIPNTITRNVDCEQQWQVPVTSGTVMEMPG
>VcDof18
MDPSSAPHHQEMGTQTLESMLVCTKANQDQKKPRPQPEQALKCPRCDSTNTKFCYYNNYSLTQPRYFCKSCRRYWTKGGTLRNVPVGGGCRKNKRSSSSSSSSKRSQDSSLSTPIPSPLSSSTFPPLSYDYSSDLSLAFSGLHKQANGNIGFEGHDHHDFSTLGNHHNISQCDFLGNPNHVGNVHSSSHHSTPASSFLDALRGGFVEAPNGFQNLNYGMGINGNYMGNLENGGEMAMPYDHQDNVSCATTTAVTVTTMKQEMCNGREGGENRVLWGFPWQIGGEGNNMGEVVDSGRDRWNISGIGSNWHGLLNSPLM
>VcDof19
MLFLSLSLYLSLSCMKSHHSLSFPRTNSESTASIKKKLKDEETSSTHKTLKNIIKTKRITKQKASSSPPLPQPLYLSFIFFLSLFSSLYLSSHFPPLLFTTDSPPYISKKQNPITTPLRKRRKQKKEEKKREIILKEDMVFSSIPVYSDHPNWHQVQQGSLNENSQLQQPPPLQVGGGSGGSGGGSSIRPGSMVDRARLAKVPQPEAGLNCPRCDSTNTKFCYFNNYSLTQPRHFCKACRRYWTRGGALRNVPVGGGYRKNKRSKSNSSNNSSKSQASTGAKSTSVSPSPSSCSHFPQPSPQFSFMATLQGLGQYGGGNVDSNIAGFQAQMAAGGGDLGFQMGNNSGGISSNLLVGGVEQWRLPFLGGLDHQQPTNYQTPVKMEESHGLNFSRQFIGGG…
>VcDof20
MSEGKDPAIKLFGKTIPLSEENNANRDQESDEALSGERLSDTEQEDGAQPITSEEIADSNAAAAENENPKTPSVDNEAAPTKTSKTEEEQSDTSNSQEKTLKKPDKILPCPRCNSMDTKFCYYNNYNVNQPRHFCKNCQRYWTAGGTMRNVPVGAGRRKNKNSASHYRHITMSEALQNARADLPNGTLHPNVKPNGTVLTFGTDSPLCESMAQVLNIAESTMRNCARNGFHKPEEQRVPASYGGGENGDDQSSGSSVTAAKPKDDVGKMGPHNPMMQNFNGFHPQVPCFPGAPWPYPWNPAQWNPAFCPPGFPMPFYPAPPPYWGCAMPGTWNVPWVTPPNSCPNQTAPSSGPNSPTLGKHSRDESVVRHTSSGEVELQKENTPERYLWIPKTLRIDDL…
>VcDof21
MAALTSLQVCMDSDWLQGAIHEDSPGMDSSSPSGEMLTCSRPLMERRLRPPHDQALKCPRCDSTHTKFCYYNNYSLTQPRYFCKTCRRYWTKGGTLRNIPVGGGCRKNKKVSSKKPNENNHQPSGGVYGQLTPPGSSSSSPTDLQLAFPDFQMSHLSNMMGNHGVGFGNPSFMETKYNAMLESPNPSRAIDFMESHNNNNSRNHDQFMGNVDQLGMVGDQMGHGLAPNYYHALCPPFGMSVDHGNSSGGPFMLPYHEGNEDQNINTVDVKPNTKLLSLGWHDQGCSDAGNNEHSFGYLNGLGSWTGLMNGYGPSTTNPLV
>VcDof22
MQEPSTFTQIQPQFPEHEQLKCPRCDSTNTKFCYYNNYNLSQPRHFCKNCRRYWTKGGALRNIPVGGGTRKNSKRSSNPKPKTTPSSSSSSVPKIEQPSVFNAGVDQDRRMLDVGGSFSSLLNGQFGNFLEGLDPHGSLGQLGGEFGGDPNLNSNSEPGHHEMRNPQVELQSGGNNPESYLGDSSNWGGGGSNGWPDLSIYTPVLNPKTWLDGWNPGALLSAQQALLSTSRSFKCILDGPDLRDAEECLPFIFGPFKTHLDGRLVLGRVCRAERSVGSLSSNGWGARPVHTHLD
>VcDof23
MDAAQWPQEIEMEGSRGIIIGDHHPRRPRPEKDKQALNCPRCSSTNTKFCYYNNYSLSQPRYMCKTCKRYWTEGGSLRNVPVGGGSRKNNISKRSSPSPLPLPSSKKQQLPPPPPPHHDLTTPNSFPQSSTTSHETQNPNKIHEGQDLNLAFPPPTTSNYKYGTPFANTSQMSPVELLNFKKYEIASIYSSSCGFPMQEFKPSLNFGVDRYGNWQGVQENSSGSSGARLFFPFEDLKIQQLQAQSSTSSSSKLAHEFDHDEKNNSRGEGGDQASGYWSGMLGGGGGSWLA
>VcDof24
MMVSRVMEKPNQEPNQNHHQQQTPPPQALKCPRCDSSNTKFCYYNNYSLSQPRHFCKGCKRYWTRGGTLRNVPVGGGCRKNKRVLIKRSSSSSSIDAHAAAPTSSSPTPPTSNPNHLHHHLLQNHLNISPSSSNPLFYGLPTNPTSSDLMTATAHHSLYPSFFSSARVSSHGFDLQAQLNGLGLGIDPINKPIQNPLLSSYSLFGSSTNNNYPTMASLLVSSLQQQQKFKEEAAGTPANFRVPYQEEDATRINNNNGEVKVEQGPKKLDWNTMNGSNFQNQIIDQQVSSQTDPSLYWNHAISFGGGGPNWLDPSLNGPSAHSLI
>VcDof25
MGLSTKQVSSDHGLDWGQSLLQSSASGALELPSKPLPARRQQSQHQPEPVACPRCASTNTKFCYYNNYNKSQPRHFCKACKRHWTKGGTLRNVPVGGGRKNKRLKTSNTTTTTSAATTATPNPSTQLANKREQLSQSFSQGEAQDKISEILYQALVPPGGNFNAKSYSGNNHGDFLSSISTLPLVQNQTLLPFTFSSLGSFESNPSSISTSFRSPNGFDFIGGLGSMEETATMISNTITRNVDCEQQWQVPVTSSTVMEMPG
>VcDof26
MDPSSAPHHQEMGTQTLESMLVCTKANQDQKKPRPQPEQALKCPRCDSTNTKFCYYNNYSLTQPRYFCKSCRRYWTKGGTLRNVPVGGGCRKNKRSSSSSSSSSKRSQDSSLSTPIPSPLSSSTFPPLSYDYSSDLSLAFSGLHKQANGNIGFEGHDHHDFSTLGNHHNISQCDFLGNPNHVGNVHSSSHHSTPASSFLDALRGGFVEAPNGFQNLNYGMGINGNYMGNLENGGEMAMPYDHQDNVSCATTTAVTVTTMKQEMCNGREGGENRVLWGFPWQIGGEGNNMGEMMYETDKRAIVLPQVMQRKNIIEMEEGDVADREARVYVALEDGDLDDLEDGTWILNSSGVLLHMQDIRPRSPDPLQSLNGLESAIPPRKDSFKAHFNNRDCS
>VcDof27
MKSHHSLSFPRTNSESTASIKKKLKDEETSSTHKTLKNIIKTKRITKQKASSSPPLPQPLYLSFIFFLSLFSSLYLSSHFPPLLFTTDSPPYISKKQNPITTPLRKRRKQKKEEKKREIILKEDMVFSSIPVYSDHPNWHQVQQGSLNENSQLQQPPPLQVGGGSGGSGGGSSIRPGSMVDRARLAKVPQPEAGLNCPRCDSTNTKFCYFNNYSLTQPRHFCKACRRYWTRGGALRNVPVGGGYRKNKRSKSNSSNNSSKSQASTGAKSTSVSPSPSSCTHFPQPSPQFSFMATLQGLGQYGGGNVDSNIAGFQAQMAAGGGDLGFQMGNNSGGISSNLLVGGVEQWRLPFLGGLDHQQPTNYQTPVKMEESHGLNFSRQFIGGGLENNQYWSGNQWAE…
>VcDof28
MDTAHWPQEMVVKPMEEIVVVQNNNINNSSSSNNNTCSSTKQASLERRVRPQKEQAINCPRCNSTNTKFCYYNNYSLSQPRYFCKTCRRYWTEGGSLRNIPVGGGSRKNKKSSSSMSSTPTSTSSTSSSSKKLIQQLPHDHHLAPNFQNPNNTNKICEEGQDLNLGFPSQYHDFKTISELIQVPNFDNSKISGNNPNSSSSHHHHLSALELLTGISTSTANTTSRGLNSFMPIPVSDPNSIYSSGFSHMQDFKPTLNFSLDGNINGSGGGGGSGGYGILQESGGGRVLFPFEDLKQVSNSSDIDHQNRGDQGGGDSTGYWNGVLGGGSW
>VcDof29
MIFSSTNNPVVLFLDPQQQPGSEIDNNQFSLPAPLPPPIISGGGGGGGGGTTITTGAGSTRPSSMVERARQAKVPLPEAALKCPRCESTNTKFCYFNNYSLTQPRHLCKTCRRYWTRGGSLRNVPVGGGCRRNKRSKKSCSSTTRSKSPLPLERSACSLSTTHDHSTIGHFLPPQAQLPLFPSLPHLSDYRSSDLGPGLNFSRIHHPLMAANGSDGNIGMNMEFQIGSNSWGGSEQWRLQQIQNYPFLVGSERPSGMYQLEAGETVNTEGNAIGAPGSKSLLHSGVVDQMDDSVKMEEKQMSRNFLGMMGNNGHYWGGGNSTAGSAWTNDVSAAADY
>VcDof30
MNGADACETRDPAIKLFGKTIPVPESLIPAKSEEKSDLGSQIPYKSEAMSLCHEIIKTETLDDHLQESRPQYKSGKVNDTQLTGDGSAAQTNLKPKEDPAETSSSIEETEKVLKKPDKILVCPRCNSLDTKFCYFNNYNVNQPRHFCKNCHRYWTAGGIVRNVPLGAGRRKNKHLASQYRRESLVSSDIVPVTRVANPHSTFKGGTVLRFGSGGQFFGSADGKRREDTSLCCSSSTASDIEVDDSQIPREVKEQDSRSNLVHCYPIPPWVLVSAPDDGSHDPIRWTQTPMLAVPPGFPLKIVPASYLTCWTAGASHSLALGKHSRDENLIDEESENCVSVPKTLRIDDPDEASKSSSVASLSFNSNQKENKLRCGVFKPYRSSQDCKAHTMDTVEVLEA…
>VcDof31
MGGMMDPASAQHQQEMGTQTLESMLVCPNTQQQLEKKPKPPQEQALKCPRCDSTNTKFCYYNNYSLTQPRYFCKSCKRYWTQGGTLRNVPVGGGCRKTKRSSPTSSKISQDQTMATVNPNALYSNDLSLAFAGTHYEALGNPNFQNNPAMFLDAPNGFFQNLCYGVGNGNLGGNVVENRGGGNAAVGEVKAELWNGRGEADQNRVLWGIPWQNVGGGDGNCIGNFDSSGKESWNGIGSFNWHGLVNSPLM
>VcDof32
MFSSSVPVYYDQRWHLLQLQDHIQGYCGSQNHQLELPLPPLSQVGGGGAPVKANSMADKARLAKLPQPEAGLKCPRCESTNTKFCYFNNYNLSQPRHFCKTCRRYWTWGGTVRNIPVGGGCRKNKRSKSKSSSKSHHQVIATSSATASASTPSGCSTETTNYFPTLSPHLQMPFMDDTQTCGGGHLGVAGFQPKIDAGGGSGDGGEACSGWIQSGSSNCLSVGGSEQWRLPLLTRLEAPVNFFHYQSHEPVDQTRSGVITSQLAPVNMEESQLRLNLSGQFMGVCENNDKFWGGIQWREISGVNSSSPSNRL
>VcDof33
MDPSSAPHHQLIVNFSLLNVFGDQTQEMGTQTLESMLVCTKANQDQKKPRPQPEQALKCPRCDSTNTKFCYYNNYSLTQPRYFCKSCRRYWTKGGTLRNVPVGGGCRKNKRSSSSSSSSKRSQDSSLSTPIPSPLSSSTFPPLSYDYSSDLSLAFSGLHKQANGNIGFEGHDHHDFSTLGNHHNISQCDFLGNPNHVGNVHSSSHHSTPASSFLDALRGGFVEAPNGFQNLNYGMGINGNYMGNLENGGEMAMPYDHQDNVSCATTTAVTVTTMKQEMCNGREGGENRVLWGFPWQIGGEGNNMGEMMYETDKRAIVLPQVMQRKNIIEMEEGDVADREARVYVALEDGDLDYLEDGTWILNTSGVLLHMQDIRPWSPDPLQSLKWIGEYDSSSKGFF
>VcDof34
MGLSTKQVSSDHGLDWGQSLLQSSTSGALELPSKPLPARRHQSQHQPEPVACPRCASTNTKFCYYNNYNKSQPRHFCKACKRHWTKGGTLRNVPVGGGRKNKRLKTSNTTTTTTTSAATTATPNPSTQLANKREQLSQSFSQGEAQDKISEILYQALVPPGGNFNAKSYSGNNHGDFLSSISTLPLVQNQTLLPFTFSSLGSFESNPSSISTSFRSPNGFDFIGGLGSMEETATMIPNTITRNVDCEQQWQVPVTSSTVMEMPVNNYWNCWDDIEPLVSTELSIPSWDIDTEKY
>VcDof35
MQDIHPIGGGGRFFGGGGGGVDRRLRPNIHQNHQSLKCPRCDSLNTKFCYNNNYNLSQPHHFCKSCCRYWTKGGVLRNVPGGGGCIKTKRSKPNRFWGSTLGVFRVLITGCNERTKEPLYEMKARSTNGINSSRRWRSWQRGFWI
>VcDof36
MIQISKSSNFELKPKHEQLKCPRCDSTNTKFCYYNNYNLSQPRHFCKNCRRYWTKGGALRNIPVGGGTRKNSKRSSNPKRRRLFLLPRCPKSSSQACSMRGWIRTVGCWTSVGVSVPF
>VcDof37
MVFSSIPAYLDPSNWQQQSNAHQVGITGSHQLPPPLPSPPPPPPHGSGVGGSGSIRPGSLADRARMANIPIPEAALKCPRCESTNTKFCYFNNYSLSQPRHFCKTCRRYWTRGGALRSVPVGGGCRRNKRSNKGSSSSSKSPANSGDLQTSGGGGGSTSAVSTSTASLLGLISPQIPSLRFMAPLSQLTCYGPSGDVGLNYAPTSDMNFHLLGNTSLGGGGGSGSGSGEWRFQPPQMGSMGGLDLTSGLYPFHHHGGMDPSSGYVNEVGPVPPRISSGPGFISSNQQSGSVKMEENHQELNLPRQFLGIQGNDQYWTGSGNGTNAWTDFSGFSSTSTTNHL
>VcDof38
MDTAHWPQEMVVKPMEEIVVVQNNNINNSSSSNNNNTCSSTKQASLERRVRPQKEQAINCPRCNSTNTKFCYYNNYSLSQPRYFCKTCRRYWTEGGSLRNIPVGGGSRKNKKSSSSMSSTPTSTSSTSSSSKKLLQQLPHDHHLAPNFQNPNNTNKICEEGQDLNLGFPSQYHDFKTISELIQVPNFDNSKISGNNPNSSSSHHHHLSALELLTGISTSTANTTSRGLNSFMPIPVSDPNSIYSSGFSHMQDFKPTLNFSLDGNINGSGGGGGSGGYGILQESGGGRVLFPFEDLKQVSNSSDIDHQNRGDQGGGDSTGYWNGVLGGGSW
>VcDof39
MIFSSTNNPVVLFLDPQQQQPGSEIDNNQFSLPAPLPPPIISGGGGGGGGSTTITTGTGSTRPSSMVERARQAKVPLPEAALKCPRCESTNTKFCYFNNYSLTQPRHLCKTCRRYWTRGGSLRNVPVGGGCRRNKRSKKSCSSTTTRSKSPLPLERSACSLSTTHDHSTIGHFLPPQAQLPLLPSLPHLSDYGGSDLGPGLNFSRIHHPLMAANGSDGNIGMNMEFQIGSNSWGGGEQWRLQQIQNYPFLVGSERPSGMYRLEAGETVNTEGNATGALGSKPLLHSGVDDQMDSSVKMEEKQMSRNFLGMMGNNGHYWG
>VcDof40
MLEVKGDPAIKLFGKTIPLVEIPPPASVGADSATPVRPSDIPVDGSIDQNRPNSPEGSNNSDGIGEDREPDKAVSGVLSDAKQEDGGRPITSEDIADPNSSAGVNDKPKTPPVDNEASTSKTEEDQNETSNSQEKTLKKPDKILPCPRCNSMDTKFCYFNNYNVNQPRHFCKNCQRYWTAGGTMRNVPVGAGRRKNKNSSSHYRHIAIPEALPNGIHHPNLNPNGSVLTFGSDTPLCESMASVLNIAEKTIQNHAQTGFCKPEELRISVPYGVGEKRDEHSSQSSFIAANSKEEIGTSVPQDPRMQNCHSFPPQMPCFPGAPWPYPWNSAQWTAPAFFPPGFPMPFYPAPPYWGCTLPGTWNVPWVTPLTSPPIQTGPNSGPNSPTLGKHSRDENMITK…
>VcDof41
MPLDSRPTTKSHQVGGAGAPLPEPEQLSCPRCDSLNTKFCYYNNYNFSQPRHFCKSCRRYWTHGGTLRDVPIGGATRKNAKRSRTNAPSPSSDHHIPVHAACTQAFAPFSAAAAHGGNGLNVCGSFTSLLSTQAAPGFLVLGGFGLGLGSGFEDMGIGLGRAAWPFPGIVGDGGGTSIMGKTWQVETGGEGWFSGGGNCYCLPGLAISTPRNGLK
>VcDof42
MIFSSTNNPVVLFLDPQQQQPGSEIDNNQFSLPAPLPPPIISGGGGGSGGGTTITTGTGSTRPSSMVERARQAKVPLSEAALKCPRCESTNTKFCYFNNYSLTQPRHLCKTCRRYWTRGGSLRNVPVGGGCRRNKRSKKSCSSTTRSKSPLPLERSACSLSTTHDHSTIGHFLPRQAQLPLLPSLPHLSDYGSSDLGPGLNFSRIHHPLMAANGSDGNIGMNMEFQIGSNSWGGGEQWRLQQIQNYPFLVGSERPSGMYQLEAGETVNTEGNATGDSGSKLLHSGVVDQMDDSVKMEEKQMSRNFLGMMGNNGHYWGGGWK
>VcDof43
MVFSSIPAYLDPSNWQQQSNAHQVGITGSHQLPPPLPSPPPPPPHGSGVGGSGSIRPGSLADRARMANIPIPEAALKCPRCESTNTKFCYFNNYSLSQPRHFCKTCRRYWTRGGALRSVPVGGGCRRNKRSNKGSSSSSKSPANSGDLQTSGGGGGSTSAVSTSTASLLGLISPQIPPLRFMAPLSQLTGYGPSGDVGLNYAATSDMNFHLLGNTSLGGGGGSGSGSGEWRFQPPQMGSMGGLDLTSGLYPFHHQGGMDPASGYVNQQSGSVKMEENHQELNLPRQYLGIQGNDQYWTGSGNGTNAWTDFSGFSSTSTTNHL
>VcDof44
MGDVHEAQGIKLFGTTIAVKESQEKDKVPTKADQPIEQKKPEKIIPCPRCKSMETKFCYFNNYNVNQPRHFCKGCQRYWTAGGALRNVPVGAGRRKNKPPCRGLAGFSESCFYDIGSGVQEIDFDGVLVEEWQLAARGGFHHVFPAKRRRSGTAGGPSC
>VcDof45
MQDIHPIGGGGGGRFFGGGGGGVDRRLRPNIHQNHQSLKCPRCDSLNTKFCYYNNYNLSQPRHFCKSCRRYWTKGGVLRNVPVGGGCRKTKRSKPKPSSSKNKSNSRSSSESSSLTASTTATKPPLATTPTATASCSTSTPSTLLNFPDSRFFNFPVDQSTDGGVFTEIGSFTSMMTSTNDHSFLGFNVGGISGTDYRLQRENEGTVVRDESSEHQWDQQQQKMEELSAGFLDRTAPIDLPGMENRGCNGEVGALDWGGGGDQAMFDLTGTVDHAYWSQTQWPDNDHSLYLP
>VcDof46
MDAAQWPQEVGMVKHMEETTPMSTTNKPMMLERKVRPQKDQALNCPRCNSTNTKFCYYNNYSLTQPRYFCKTCRRYWTEGGSLRNVPVGGGSRKNKRSSSTNSSSSTPSSSSKLPDLNPPISLTPFSNNSQNPNSHQGRDLNLGFPHAMQDYLSISQFVEFPKIQINTSSSSSSPSSANTSALELLRAGISTSRGLHSFMSTPMPATDSNVPYGSLGFHLQDLKPNLGFAVDGAGSLMYPFGGSVKQVSSTSGSVDQSQKGQGNSNGYWSGMLGGGSW
>VcDof47
MPSDSADQGPTRPQHGPNHQPEPEALPCPRCTSTNTKFCYYNNYNLSQPRHYCKSCRRYWTRGGTLRNVPIGGGTRNHSSKNPNNNNNNKKRPRTASKTASSHLTYDPVHLDPITQIPSSFGVNLNEKVPEAVEGDYAPFVNLNGGGFFGLGGYGIGFRELGFGLSSGIWAVEDPAMEDVSCGNGGEVGGDGGGGGMEGRLGDGSCFGWPDLAVSTPGEGHK
>VcDof48
MPSDSADQGPTRPQHGPNHQPEPEALPCPRCTSTNTKFCYYNNYNLSQPRHYCKSCRRYWTRGGTLRNVPVGGGTRNHAKNPNNNNNNNKKRPRTSSKTASSHLTYDPVHLDPITQIPSSFGVNLNEKVPEAVEGDYAPFVNLNGGGFFGLGGYGIGFRELGFGLSSGIWAVEDPAMEDVSCGNGGEVGGDGGGGMEGRLGDGSCFGWPDLAVSTPGEGHK
>VcDof49
MGGMMDPASAQHQQEMGTQTLESMLVCPNTQQQLEKKPKPPQEQALKCPRCDSTNTKFCYYNNYSLTQPRYFCKSCKRYWTQGGTLRNVPVGGGCRKTKRSSPTSSKISQDQTMATVNPNALYSNDLSLAFAGTHYEALGNPNFQNNPAMFLDAPNGFFQNLCYGVGNGNLGGNVVENRGGNAAVGEVKAELWNGRGEADQNRVLWGIPWQNVGGDGNCIGNFDSSGKESWNGIGSFNWHGLVNSPLM
>VcDof50
MFSSSVPVYYDQRWHLLQLQDHIQGYCGSQNHQLEPPLPPLSQVGAPVKANSMADKARLAKLPQPEAGLKCPRCESTNTKFCYFNNYNLSQPRHFCKTCRRYWTWGGTVRNIPVGGGCRKNKKSKSKSSSKSHHPVIITSSATGSASTPSGCSTETTNYFPTLSPHLQMPFMDDHDIQTCGRGHLGVVGFQPKIEAGGGSGDGGEACSGWFQSGGSNCLSVGGAEQWRLPLLTGLEAPVNFFQYQSHEPVDQTRSGVITSQLTPVNMEESQLRLNLSGQFMGVCENNDQFLGGIQWREISGVNSSSPSNRL
>VcDof51
MDAAQWPQEIEMEGSRGIIIGDHHPRRPRPEKDKQALNCPRCSSTNTKFCYYNNYSLSQPRYMCKTCKRYWTEGGSLRNVPVGGGSRKNNISKRSSPSPLPLPSSKKQQLPPPHHHHDLTTPNSFPQSSTTSHETQNPNKIHEGQDLNLAFPPPTTSNYKYGTPFANTSQMSPVELFNFKKYEIASIYSSSCGFPMQEFKPSLNFGVDRYGNWQGVQENSSGARLFFPFEDLKIQQLQAQSSTSSSSKIAHEFDHDEKNNSRGEGGDQASGYWSGMLGGGGGGSWLA
